# Supplementary material for: Identification of candidate genes in ischemic cardiomyopathy by gene expression omnibus database
Source: BMC Cardiovasc Disord. 2020 Jul 6;20:320. doi: 10.1186/s12872-020-01596-w (PMC7336680; doi:10.1186/s12872-020-01596-w)
Supplement: Supplementary file 1 — Additional file 1. All differentially expressed genes between ICM and healthy control. [file 12872_2020_1596_MOESM1_ESM.xlsx]

## Sheet: Sheet1
ID	Symbol	Combined.ES	P.Value	FDR	UpDown
8547	FCN3	-2.79192	0	0	Down
57570	TRMT5	2.40991	0	0	Up
5654	HTRA1	2.35449	0	0	Up
54829	ASPN	2.65145	0	0	Up
4140	MARK3	-2.33951	0	0	Down
4060	LUM	2.86818	0	0	Up
3163	HMOX2	-2.76632	0	0	Down
3151	HMGN2	2.97328	0	0	Up
28231	SLCO4A1	-2.52769	0	0	Down
25878	MXRA5	2.29392	0	0	Up
12	SERPINA3	-2.63144	0	0	Down
2289	FKBP5	-2.07987	4.44089e-16	4.01013e-13	Down
392	ARHGAP1	2.03315	1.55431e-15	1.30329e-12	Up
84525	HOPX	-1.95509	1.40332e-13	9.69035e-11	Down
2487	FRZB	1.8101	3.18634e-13	2.07802e-10	Up
2752	GLUL	-1.85398	3.79252e-13	2.299e-10	Down
51466	EVL	1.84077	3.91687e-13	2.299e-10	Up
262	AMD1	-1.82825	4.49862e-13	2.44565e-10	Down
476	ATP1A1	-1.83379	4.67182e-13	2.44565e-10	Down
4628	MYH10	1.79189	1.08225e-12	5.29353e-10	Up
10947	AP3M2	1.79928	1.27431e-12	5.98367e-10	Up
10157	AASS	-1.75903	1.42153e-12	6.29924e-10	Down
3910	LAMA4	1.86981	1.44884e-12	6.29924e-10	Up
3043	HBB	1.82337	1.55898e-12	6.536e-10	Up
27254	CSDC2	-1.70918	3.50608e-12	1.41924e-09	Down
4624	MYH6	-1.79853	4.11293e-12	1.56286e-09	Down
1513	CTSK	1.71424	4.12714e-12	1.56286e-09	Up
23022	PALLD	-1.7121	6.10179e-12	2.2384e-09	Down
1842	ECM2	1.6876	1.08586e-11	3.86272e-09	Up
4330	MN1	1.66379	1.13491e-11	3.91846e-09	Up
7060	THBS4	1.75312	1.6261e-11	5.45394e-09	Up
9057	SLC7A6	-1.63548	2.04934e-11	6.68255e-09	Down
9588	PRDX6	-1.65662	2.30989e-11	7.32858e-09	Down
598	BCL2L1	-1.62205	2.91465e-11	9.00396e-09	Down
23114	NFASC	1.7045	3.06266e-11	9.21861e-09	Up
5533	PPP3CC	-1.61759	3.49913e-11	1.02691e-08	Down
57758	SCUBE2	1.6008	5.44127e-11	1.55793e-08	Up
4878	NPPA	1.59787	5.95264e-11	1.66376e-08	Up
80760	ITIH5	1.63781	6.97613e-11	1.90448e-08	Up
5604	MAP2K1	-1.65453	7.18436e-11	1.91676e-08	Down
9865	TRIL	1.59337	8.8439e-11	2.30708e-08	Up
23212	RRS1	-1.6401	1.44176e-10	3.526e-08	Down
8668	EIF3I	-1.57269	1.6243e-10	3.89136e-08	Down
123	PLIN2	-1.68169	1.84297e-10	4.30668e-08	Down
57037	ANKMY2	1.5672	1.87103e-10	4.30668e-08	Up
10212	DDX39A	-1.56592	2.01137e-10	4.54068e-08	Down
7079	TIMP4	-1.53535	2.15822e-10	4.78026e-08	Down
1580	CYP4B1	-1.53414	2.22785e-10	4.84311e-08	Down
83468	GLT8D2	1.53156	2.45558e-10	5.14751e-08	Up
26528	DAZAP1	-1.54858	3.5273e-10	7.26438e-08	Down
604	BCL6	-1.52937	4.18812e-10	8.47662e-08	Down
23090	ZNF423	1.56531	5.82457e-10	1.15889e-07	Up
7052	TGM2	-1.55959	7.05165e-10	1.37966e-07	Down
79887	PLBD1	1.47905	7.29411e-10	1.4037e-07	Up
51226	COPZ2	1.48543	9.23206e-10	1.69794e-07	Up
79987	SVEP1	1.4947	9.24492e-10	1.69794e-07	Up
3782	KCNN3	1.46759	9.77419e-10	1.75277e-07	Up
6628	SNRPB	-1.55801	9.8677e-10	1.75277e-07	Down
10527	IPO7	-1.48453	1.00039e-09	1.75277e-07	Down
4053	LTBP2	1.47219	1.01931e-09	1.75965e-07	Up
1278	COL1A2	1.46031	1.11256e-09	1.89281e-07	Up
3995	FADS3	-1.5186	1.23173e-09	2.06561e-07	Down
4501	MT1X	-1.47575	1.27994e-09	2.11622e-07	Down
26002	MOXD1	1.45394	1.49105e-09	2.3809e-07	Up
64771	C6orf106	-1.44924	1.50087e-09	2.3809e-07	Down
4239	MFAP4	1.47605	1.53628e-09	2.40459e-07	Up
5817	PVR	-1.46	1.64195e-09	2.53616e-07	Down
5116	PCNT	-1.5574	1.67007e-09	2.5461e-07	Down
283298	OLFML1	1.45782	1.80055e-09	2.70982e-07	Up
9674	KIAA0040	-1.43601	2.00265e-09	2.94297e-07	Down
7779	SLC30A1	1.47892	2.0056e-09	2.94297e-07	Up
26287	ANKRD2	-1.44927	2.22193e-09	3.22015e-07	Down
2331	FMOD	1.43875	2.26304e-09	3.23973e-07	Up
9064	MAP3K6	-1.45312	2.74399e-09	3.82325e-07	Down
2246	FGF1	1.46551	2.76835e-09	3.82325e-07	Up
6507	SLC1A3	-1.41554	3.15669e-09	4.25935e-07	Down
10383	TUBB4B	-1.41587	3.72652e-09	4.91524e-07	Down
28232	SLCO3A1	-1.4233	3.98457e-09	5.19721e-07	Down
641	BLM	-1.46122	4.11186e-09	5.3043e-07	Down
9332	CD163	-1.4294	4.33432e-09	5.5305e-07	Down
2878	GPX3	-1.47927	5.7647e-09	7.04914e-07	Down
1307	COL16A1	1.46047	5.91271e-09	7.12632e-07	Up
22864	R3HDM2	1.39428	6.21884e-09	7.37403e-07	Up
23026	MYO16	-1.38662	7.17264e-09	8.41996e-07	Down
6424	SFRP4	1.38044	7.42494e-09	8.62984e-07	Up
56034	PDGFC	1.39582	8.24068e-09	9.39197e-07	Up
64061	TSPYL2	-1.43536	8.66724e-09	9.68998e-07	Down
79583	TMEM231	1.37745	8.80194e-09	9.74774e-07	Up
3155	HMGCL	1.48456	9.08458e-09	9.96671e-07	Up
51491	NOP16	-1.43986	9.54056e-09	1.02749e-06	Down
7078	TIMP3	-1.41303	9.64378e-09	1.02917e-06	Down
4958	OMD	1.3599	1.06951e-08	1.13108e-06	Up
6584	SLC22A5	-1.46968	1.11019e-08	1.16362e-06	Down
78991	PCYOX1L	1.37471	1.30832e-08	1.34723e-06	Up
7373	COL14A1	1.36185	1.4612e-08	1.49156e-06	Up
56898	BDH2	1.37727	1.50155e-08	1.51349e-06	Up
54583	EGLN1	-1.38383	1.51669e-08	1.51349e-06	Down
83700	JAM3	1.34832	1.52135e-08	1.51349e-06	Up
187	APLNR	1.43905	1.61074e-08	1.58895e-06	Up
8722	CTSF	1.35511	1.80061e-08	1.76144e-06	Up
9686	VGLL4	1.33442	1.83976e-08	1.77346e-06	Up
1978	EIF4EBP1	-1.34278	1.84311e-08	1.77346e-06	Down
30845	EHD3	1.37586	1.86062e-08	1.77576e-06	Up
10858	CYP46A1	1.35732	1.95497e-08	1.85076e-06	Up
10894	LYVE1	-1.38483	1.97815e-08	1.85772e-06	Down
8324	FZD7	1.34142	2.24965e-08	2.07942e-06	Up
5179	PENK	1.34506	2.35965e-08	2.15753e-06	Up
8073	PTP4A2	-1.40338	2.37091e-08	2.15753e-06	Down
54407	SLC38A2	-1.38186	2.59019e-08	2.33894e-06	Down
30008	EFEMP2	1.35293	2.8466e-08	2.53615e-06	Up
29995	LMCD1	-1.41541	2.85179e-08	2.53615e-06	Down
23787	MTCH1	-1.33861	2.97128e-08	2.62255e-06	Down
3790	KCNS3	1.31928	3.36658e-08	2.92743e-06	Up
56288	PARD3	-1.36871	3.80724e-08	3.26228e-06	Down
80310	PDGFD	1.36618	4.02243e-08	3.39707e-06	Up
9910	RABGAP1L	1.39128	4.10094e-08	3.43864e-06	Up
81578	COL21A1	1.33942	4.16628e-08	3.46865e-06	Up
57125	PLXDC1	1.30344	4.40037e-08	3.63774e-06	Up
966	CD59	-1.29685	4.7467e-08	3.84286e-06	Down
161291	TMEM30B	1.28913	5.02516e-08	4.02822e-06	Up
51196	PLCE1	1.35107	5.04429e-08	4.02822e-06	Up
80273	GRPEL1	-1.28617	5.64084e-08	4.47418e-06	Down
1306	COL15A1	1.38304	5.75779e-08	4.53629e-06	Up
333	APLP1	1.3181	5.94561e-08	4.65303e-06	Up
4692	NDN	1.3189	6.1034e-08	4.74489e-06	Up
10135	NAMPT	-1.29862	6.40234e-08	4.94455e-06	Down
3678	ITGA5	-1.3323	6.86312e-08	5.26576e-06	Down
221395	GPR116	-1.38949	8.11781e-08	6.18798e-06	Down
10234	LRRC17	1.29294	8.41254e-08	6.33044e-06	Up
4499	MT1M	-1.29221	8.56137e-08	6.36088e-06	Down
6649	SOD3	1.26843	8.95806e-08	6.61375e-06	Up
9258	MFHAS1	-1.29256	9.91895e-08	7.27741e-06	Down
23126	POGZ	1.25171	1.0022e-07	7.30734e-06	Up
7049	TGFBR3	-1.2557	1.02781e-07	7.44784e-06	Down
81631	MAP1LC3B	-1.3371	1.03921e-07	7.48425e-06	Down
58526	MID1IP1	-1.24775	1.07368e-07	7.68534e-06	Down
191	AHCY	-1.26441	1.10704e-07	7.87611e-06	Down
23012	STK38L	1.24259	1.18434e-07	8.3753e-06	Up
55008	HERC6	1.30157	1.34935e-07	9.42858e-06	Up
2828	GPR4	-1.26475	1.39386e-07	9.68195e-06	Down
5320	PLA2G2A	-1.2698	1.41391e-07	9.76348e-06	Down
25891	PAMR1	1.3234	1.42967e-07	9.81459e-06	Up
2288	FKBP4	-1.33573	1.52267e-07	1.03922e-05	Down
1519	CTSO	1.28885	1.6008e-07	1.08623e-05	Up
3898	LAD1	-1.30669	1.67167e-07	1.1278e-05	Down
5918	RARRES1	-1.24195	1.82901e-07	1.2269e-05	Down
2191	FAP	1.24029	1.88091e-07	1.25455e-05	Up
81031	SLC2A10	1.23706	1.90282e-07	1.26199e-05	Up
9737	GPRASP1	1.24895	1.92016e-07	1.26634e-05	Up
55325	UFSP2	1.25874	2.04079e-07	1.33837e-05	Up
25777	SUN2	-1.25159	2.15461e-07	1.40517e-05	Down
488	ATP2A2	-1.21043	2.21966e-07	1.43959e-05	Down
2131	EXT1	1.21629	2.37674e-07	1.533e-05	Up
1910	EDNRB	-1.21648	2.48006e-07	1.567e-05	Down
7453	WARS	-1.19955	2.80044e-07	1.74611e-05	Down
5507	PPP1R3C	1.28149	2.81127e-07	1.74611e-05	Up
6596	HLTF	1.27846	2.88497e-07	1.78246e-05	Up
8660	IRS2	-1.31158	2.91836e-07	1.79364e-05	Down
23516	SLC39A14	-1.21883	2.95069e-07	1.79583e-05	Down
5786	PTPRA	1.20184	2.9525e-07	1.79583e-05	Up
1277	COL1A1	1.1949	3.10057e-07	1.87617e-05	Up
26577	PCOLCE2	1.1987	3.37668e-07	2.03276e-05	Up
3716	JAK1	-1.18787	3.55198e-07	2.09819e-05	Down
7518	XRCC4	-1.27855	3.56338e-07	2.09819e-05	Down
23127	COLGALT2	1.19551	3.56346e-07	2.09819e-05	Up
51177	PLEKHO1	-1.30043	3.57473e-07	2.09819e-05	Down
7508	XPC	1.18618	3.71427e-07	2.16924e-05	Up
10964	IFI44L	1.22545	3.73855e-07	2.17262e-05	Up
900	CCNG1	-1.22272	4.18296e-07	2.40705e-05	Down
8459	TPST2	-1.18178	4.5772e-07	2.62106e-05	Down
7846	TUBA1A	1.19863	4.61267e-07	2.62855e-05	Up
93129	ORAI3	1.19238	5.00768e-07	2.83987e-05	Up
316	AOX1	-1.19307	5.29173e-07	2.98652e-05	Down
4223	MEOX2	1.18604	5.32609e-07	2.99153e-05	Up
23154	NCDN	1.17574	5.68954e-07	3.18045e-05	Up
56983	POGLUT1	-1.26612	5.77996e-07	3.21569e-05	Down
51002	TPRKB	-1.16465	5.9319e-07	3.25395e-05	Down
2960	GTF2E1	1.21685	5.99065e-07	3.27089e-05	Up
79611	ACSS3	-1.18494	6.04152e-07	3.28126e-05	Down
5274	SERPINI1	1.16934	6.06553e-07	3.28126e-05	Up
65983	GRAMD3	-1.17929	6.20972e-07	3.34385e-05	Down
10807	SDCCAG3	-1.17978	6.35353e-07	3.40566e-05	Down
6774	STAT3	-1.23205	6.41236e-07	3.42158e-05	Down
4675	NAP1L3	1.15847	6.77233e-07	3.56504e-05	Up
6217	RPS16	-1.15349	6.92521e-07	3.62924e-05	Down
10324	KLHL41	-1.15766	7.00032e-07	3.6523e-05	Down
6175	RPLP0	-1.20509	7.34387e-07	3.81459e-05	Down
1408	CRY2	1.21191	7.55967e-07	3.90938e-05	Up
9180	OSMR	-1.18676	7.81321e-07	4.01731e-05	Down
6586	SLIT3	1.17262	7.83681e-07	4.01731e-05	Up
7058	THBS2	1.153	7.98031e-07	4.07308e-05	Up
55753	OGDHL	1.14668	8.27218e-07	4.20377e-05	Up
80308	FLAD1	-1.15391	8.31937e-07	4.20953e-05	Down
23484	LEPROTL1	1.16392	9.15432e-07	4.58405e-05	Up
56944	OLFML3	1.17016	9.30614e-07	4.62901e-05	Up
9045	RPL14	-1.14292	9.38992e-07	4.65098e-05	Down
3015	H2AFZ	-1.15635	1.00367e-06	4.91221e-05	Down
55187	VPS13D	-1.17076	1.00429e-06	4.91221e-05	Down
5270	SERPINE2	1.20338	1.04413e-06	5.04266e-05	Up
2874	GPS2	-1.16302	1.0504e-06	5.04266e-05	Down
29087	THYN1	1.22634	1.05243e-06	5.04266e-05	Up
51474	LIMA1	1.13337	1.25466e-06	5.91503e-05	Up
3148	HMGB2	1.15191	1.26891e-06	5.95829e-05	Up
9805	SCRN1	1.12973	1.31323e-06	6.11746e-05	Up
2687	GGT5	-1.13082	1.3249e-06	6.14741e-05	Down
5999	RGS4	1.16119	1.46618e-06	6.77619e-05	Up
8334	HIST1H2AC	1.12351	1.54187e-06	7.09806e-05	Up
10328	EMC8	-1.18979	1.73657e-06	7.87782e-05	Down
23213	SULF1	1.1067	1.7381e-06	7.87782e-05	Up
22872	SEC31A	1.14286	1.92007e-06	8.63517e-05	Up
79825	EFCC1	1.09576	2.18407e-06	9.71166e-05	Up
27232	GNMT	-1.12589	2.20689e-06	9.77611e-05	Down
3384	ICAM2	-1.09907	2.3122e-06	0.000102041	Down
4967	OGDH	-1.09804	2.33352e-06	0.000102596	Down
55114	ARHGAP17	1.108	2.38478e-06	0.000104352	Up
29969	MDFIC	1.08912	2.39124e-06	0.000104352	Up
65997	RASL11B	1.11501	2.43301e-06	0.000105782	Up
1281	COL3A1	1.08571	2.45676e-06	0.00010642	Up
3693	ITGB5	1.11541	2.4968e-06	0.000107296	Up
6919	TCEA2	1.08497	2.49855e-06	0.000107296	Up
6387	CXCL12	1.16483	2.50439e-06	0.000107296	Up
79689	STEAP4	-1.10522	2.52548e-06	0.000107322	Down
7360	UGP2	-1.14599	2.52663e-06	0.000107322	Down
1105	CHD1	-1.09961	2.54021e-06	0.000107322	Down
875	CBS	-1.1475	2.54157e-06	0.000107322	Down
8344	HIST1H2BE	-1.17667	2.62172e-06	0.00011031	Down
10270	AKAP8	-1.11851	2.70991e-06	0.000113253	Down
28513	CDH19	-1.09346	2.73486e-06	0.000113846	Down
3601	IL15RA	-1.10323	2.76855e-06	0.000114731	Down
26112	CCDC69	-1.10466	2.83472e-06	0.000116761	Down
2149	F2R	1.1048	2.89552e-06	0.000118848	Up
8483	CILP	1.07562	3.00851e-06	0.000122499	Up
83460	EMC6	-1.07256	3.31715e-06	0.000133815	Down
10162	LPCAT3	-1.07737	3.37602e-06	0.000135723	Down
399665	FAM102A	1.07061	3.38976e-06	0.00013581	Up
8225	GTPBP6	-1.06761	3.52284e-06	0.000140662	Down
5684	PSMA3	-1.08766	3.57538e-06	0.000141689	Down
2888	GRB14	-1.08317	3.57912e-06	0.000141689	Down
5714	PSMD8	-1.09147	3.58476e-06	0.000141689	Down
4356	MPP3	-1.07332	3.83265e-06	0.000150473	Down
6103	RPGR	-1.10592	3.98379e-06	0.000154342	Down
9341	VAMP3	1.09393	4.27212e-06	0.000164575	Up
9526	MPDU1	-1.06332	4.27596e-06	0.000164575	Down
51031	GLOD4	1.08883	4.42116e-06	0.000169608	Up
51042	ZNF593	-1.133	4.4589e-06	0.000170498	Down
8082	SSPN	1.06342	4.54985e-06	0.000173411	Up
1981	EIF4G1	-1.07809	4.57698e-06	0.000173881	Down
50650	ARHGEF3	1.07293	4.60676e-06	0.000173887	Up
2628	GATM	1.13245	4.90165e-06	0.000184425	Up
6892	TAPBP	1.08382	5.08473e-06	0.000190702	Up
3177	SLC29A2	-1.04809	5.53085e-06	0.000205464	Down
23580	CDC42EP4	-1.06307	5.59916e-06	0.000207345	Down
201229	LYRM9	1.11839	5.66724e-06	0.000209207	Up
6196	RPS6KA2	-1.08691	5.84046e-06	0.000214925	Down
7048	TGFBR2	-1.04581	5.95183e-06	0.000218339	Down
2042	EPHA3	1.03599	6.14286e-06	0.000223394	Up
10267	RAMP1	-1.13218	6.14672e-06	0.000223394	Down
6176	RPLP1	-1.07052	6.19582e-06	0.000224484	Down
81621	KAZALD1	1.05742	6.24173e-06	0.000225451	Up
5168	ENPP2	1.06963	6.26861e-06	0.000225728	Up
23265	EXOC7	1.06534	6.29712e-06	0.000226061	Up
8545	CGGBP1	-1.09773	6.90817e-06	0.000245012	Down
3913	LAMB2	1.06562	6.90852e-06	0.000245012	Up
79971	WLS	1.03409	6.93191e-06	0.000245101	Up
5052	PRDX1	-1.10758	6.95498e-06	0.000245179	Down
3336	HSPE1	-1.10728	7.00791e-06	0.000246305	Down
8396	PIP4K2B	1.05645	7.21897e-06	0.000252966	Up
1489	CTF1	1.02873	7.4831e-06	0.000261441	Up
22883	CLSTN1	1.03465	7.6771e-06	0.000267423	Up
51780	KDM3B	1.04524	7.91657e-06	0.000274949	Up
25960	GPR124	1.06387	8.06449e-06	0.00027926	Up
6775	STAT4	1.02829	8.1994e-06	0.000283096	Up
5745	PTH1R	-1.04537	8.53294e-06	0.000293748	Down
79630	C1orf54	1.05396	8.89039e-06	0.000304269	Up
249	ALPL	-1.03085	9.2225e-06	0.000314718	Down
5193	PEX12	1.05698	9.44818e-06	0.000320556	Up
9278	ZBTB22	1.03904	9.53777e-06	0.000322662	Up
4802	NFYC	1.02615	9.61112e-06	0.00032421	Up
5096	PCCB	1.07016	9.85978e-06	0.000330697	Up
5993	RFX5	1.02958	9.97957e-06	0.000332813	Up
29105	C16orf80	1.06472	1.02173e-05	0.000339658	Up
79144	PPDPF	1.01438	1.02904e-05	0.000339658	Up
51455	REV1	-1.01634	1.03245e-05	0.000339658	Down
1428	CRYM	1.03818	1.06166e-05	0.000348124	Up
201254	STRA13	-1.0229	1.06738e-05	0.000349024	Down
50814	NSDHL	-1.02676	1.12954e-05	0.000366288	Down
51510	CHMP5	1.00992	1.15137e-05	0.00037234	Up
5799	PTPRN2	1.02451	1.16227e-05	0.000373897	Up
7327	UBE2G2	-1.01175	1.19467e-05	0.000381092	Down
7345	UCHL1	1.01326	1.20967e-05	0.000384529	Up
169611	OLFML2A	1.06639	1.21199e-05	0.000384529	Up
1368	CPM	-1.03821	1.22348e-05	0.000386088	Down
10611	PDLIM5	-1.02406	1.24461e-05	0.000391703	Down
3075	CFH	0.997626	1.26717e-05	0.000395929	Up
8434	RECK	1.01096	1.31789e-05	0.000409278	Up
2252	FGF7	-1.00756	1.32347e-05	0.000409511	Down
5325	PLAGL1	0.993862	1.49813e-05	0.000456793	Up
223	ALDH9A1	1.01344	1.5083e-05	0.000458702	Up
27006	FGF22	-1.01614	1.51667e-05	0.000460056	Down
2053	EPHX2	1.0396	1.548e-05	0.000467146	Up
6675	UAP1	-1.0364	1.56288e-05	0.000469374	Down
9846	GAB2	0.989743	1.56338e-05	0.000469374	Up
7447	VSNL1	0.985841	1.57346e-05	0.000471196	Up
10956	OS9	0.996909	1.58975e-05	0.000473657	Up
5810	RAD1	-1.03526	1.62706e-05	0.000481111	Down
1052	CEBPD	-1.04379	1.63818e-05	0.000482892	Down
79605	PGBD5	0.982457	1.70689e-05	0.000499681	Up
23179	RGL1	1.01414	1.76244e-05	0.000514658	Up
3099	HK2	-1.03798	1.76695e-05	0.000514697	Down
901	CCNG2	1.03351	1.87261e-05	0.000542779	Up
10681	GNB5	1.01286	1.89994e-05	0.000549346	Up
64850	ETNPPL	-0.99578	1.91538e-05	0.000552447	Down
22822	PHLDA1	0.98056	2.00326e-05	0.000574969	Up
55186	SLC25A36	-0.971818	2.02359e-05	0.000579389	Down
64288	ZSCAN31	0.990178	2.03449e-05	0.000579682	Up
54438	GFOD1	-0.980388	2.12624e-05	0.000602897	Down
8321	FZD1	0.987208	2.20439e-05	0.000623549	Up
51207	DUSP13	-0.983968	2.21373e-05	0.000624687	Down
63917	GALNT11	1.02059	2.24879e-05	0.000633059	Up
6567	SLC16A2	1.01023	2.2597e-05	0.000634608	Up
57817	HAMP	-1.02195	2.26971e-05	0.000635897	Down
79717	PPCS	0.965378	2.33129e-05	0.000648508	Up
23099	ZBTB43	-0.964877	2.38659e-05	0.000662322	Down
1742	DLG4	1.00422	2.39743e-05	0.000663761	Up
51321	AMZ2	0.982899	2.40843e-05	0.000665236	Up
79080	CCDC86	-1.06524	2.45626e-05	0.000676855	Down
9823	ARMCX2	0.966276	2.47378e-05	0.000680087	Up
1983	EIF5	-1.03586	2.51335e-05	0.000689352	Down
54187	NANS	-0.957731	2.53615e-05	0.000693984	Down
5793	PTPRG	-0.963923	2.64386e-05	0.000720099	Down
23424	TDRD7	0.957648	2.68794e-05	0.000729247	Up
55272	IMP3	-1.02651	2.69233e-05	0.000729247	Down
23150	FRMD4B	1.00496	2.69608e-05	0.000729247	Up
9789	SPCS2	-1.00785	2.72484e-05	0.00073533	Down
8910	SGCE	0.964238	2.74261e-05	0.000738429	Up
6193	RPS5	-1.00851	2.75014e-05	0.000738761	Down
3658	IREB2	-0.975306	2.7905e-05	0.000745956	Down
60492	CCDC90B	0.962571	2.79598e-05	0.000745956	Up
11222	MRPL3	-0.951523	2.88162e-05	0.000765325	Down
3437	IFIT3	0.987061	2.88838e-05	0.000765389	Up
55671	SMEK1	-1.05269	3.03445e-05	0.000796899	Down
113791	PIK3IP1	0.956339	3.11766e-05	0.000813293	Up
26509	MYOF	1.02313	3.16616e-05	0.000824115	Up
57509	MTUS1	-0.952891	3.18081e-05	0.000826096	Down
5740	PTGIS	0.953376	3.42495e-05	0.000878311	Up
8837	CFLAR	-0.956291	3.42675e-05	0.000878311	Down
56967	C14orf132	0.948249	3.44862e-05	0.000881071	Up
64112	MOAP1	0.971778	3.45253e-05	0.000881071	Up
4907	NT5E	0.947353	3.53314e-05	0.000898079	Up
7716	VEZF1	-0.982322	3.5736e-05	0.000906059	Down
328	APEX1	-0.940611	3.60748e-05	0.000912676	Down
79365	BHLHE41	0.940634	3.61844e-05	0.000912679	Up
9812	KIAA0141	0.977198	3.67287e-05	0.000919781	Up
1363	CPE	0.958033	3.69336e-05	0.000922476	Up
23476	BRD4	-0.984962	3.74334e-05	0.000929925	Down
4154	MBNL1	-0.959537	3.74554e-05	0.000929925	Down
10630	PDPN	-1.01163	3.74695e-05	0.000929925	Down
91120	ZNF682	-0.947617	3.853e-05	0.000950217	Down
360	AQP3	-0.935502	3.86765e-05	0.000951832	Down
3797	KIF3C	0.943453	3.92492e-05	0.000963337	Up
633	BGN	0.933026	3.95805e-05	0.00096799	Up
1123	CHN1	0.944675	4.02618e-05	0.000980568	Up
5998	RGS3	0.928359	4.09131e-05	0.000992312	Up
8431	NR0B2	0.993929	4.26107e-05	0.00102292	Up
25776	CBY1	0.954063	4.27581e-05	0.00102436	Up
54453	RIN2	0.966914	4.31228e-05	0.00103099	Up
8454	CUL1	-0.964565	4.35373e-05	0.00103879	Down
55737	VPS35	0.980971	4.397e-05	0.00104699	Up
11015	KDELR3	0.931115	4.41381e-05	0.00104886	Up
10916	MAGED2	0.953234	4.48453e-05	0.00106351	Up
6622	SNCA	0.924445	4.5392e-05	0.00107431	Up
23175	LPIN1	-0.922574	4.62162e-05	0.00109161	Down
2642	GCGR	-0.961592	4.64208e-05	0.00109424	Down
10346	TRIM22	0.987869	4.72868e-05	0.00111242	Up
56999	ADAMTS9	-0.921432	4.75639e-05	0.00111671	Down
64344	HIF3A	-0.928908	4.78805e-05	0.00112189	Down
9240	PNMA1	0.92447	4.81445e-05	0.00112583	Up
93664	CADPS2	-0.91726	4.87457e-05	0.00113763	Down
23326	USP22	0.933498	5.00401e-05	0.00116321	Up
11224	RPL35	-0.957585	5.02708e-05	0.00116396	Down
9734	HDAC9	0.936021	5.12745e-05	0.00118474	Up
51374	ATRAID	1.02701	5.14051e-05	0.00118474	Up
51082	POLR1D	-0.91466	5.14709e-05	0.00118474	Down
6320	CLEC11A	0.912799	5.32724e-05	0.00122142	Up
3275	PRMT2	0.921548	5.46556e-05	0.00125069	Up
57117	INTS12	-0.957741	5.53981e-05	0.00126521	Down
16	AARS	-1.0163	5.61543e-05	0.00127975	Down
4892	NRAP	-0.957194	5.62527e-05	0.00127975	Down
6352	CCL5	0.952138	5.66755e-05	0.00128674	Up
55329	MNS1	0.912077	5.70399e-05	0.00128674	Up
5245	PHB	-0.925358	5.71771e-05	0.00128674	Down
4883	NPR3	0.941079	5.72199e-05	0.00128674	Up
334	APLP2	0.96917	5.73272e-05	0.00128674	Up
2192	FBLN1	0.936859	5.76224e-05	0.0012909	Up
54470	ARMCX6	0.948466	5.98141e-05	0.00133237	Up
6709	SPTAN1	0.934696	6.08427e-05	0.00135271	Up
93081	TEX30	-0.959417	6.11693e-05	0.0013574	Down
3306	HSPA2	0.917388	6.248e-05	0.00138127	Up
23564	DDAH2	0.92817	6.2925e-05	0.00138849	Up
51651	PTRH2	-0.955226	6.32142e-05	0.00138933	Down
125	ADH1B	-0.94104	6.32429e-05	0.00138933	Down
55687	TRMU	-0.913921	6.3455e-05	0.00138933	Down
55629	PNRC2	0.907121	6.35549e-05	0.00138933	Up
64102	TNMD	0.925258	6.40969e-05	0.00139858	Up
481	ATP1B1	-0.901651	6.60205e-05	0.00143521	Down
10525	HYOU1	-0.950485	6.65662e-05	0.00144174	Down
114897	C1QTNF1	-0.968796	6.70387e-05	0.0014493	Down
1311	COMP	0.901939	6.75907e-05	0.00145587	Up
55658	RNF126	-0.964164	6.80322e-05	0.00146269	Down
51287	COA4	-0.973017	6.81914e-05	0.00146344	Down
3856	KRT8	-0.908054	7.14961e-05	0.00152877	Down
10574	CCT7	-0.967227	7.25563e-05	0.00154776	Down
51626	DYNC2LI1	0.936618	7.26482e-05	0.00154776	Up
4927	NUP88	-0.937696	7.29309e-05	0.00155097	Down
5379	PMS2P1	0.927106	7.33708e-05	0.0015575	Up
10237	SLC35B1	-0.90025	7.44082e-05	0.00157383	Down
55022	PID1	-0.908158	7.48017e-05	0.00157931	Down
63932	CXorf56	0.910168	7.55741e-05	0.0015899	Up
29074	MRPL18	-0.977201	7.6868e-05	0.00160847	Down
10983	CCNI	0.896822	7.72333e-05	0.00161324	Up
11326	VSIG4	-0.962073	7.79592e-05	0.00161976	Down
9149	DYRK1B	0.894143	7.94241e-05	0.00164728	Up
10419	PRMT5	-0.963308	8.0561e-05	0.00166497	Down
79058	ASPSCR1	-0.913516	8.08083e-05	0.00166715	Down
8202	NCOA3	-0.905651	8.23011e-05	0.00169497	Down
4616	GADD45B	-0.941119	8.27173e-05	0.00169758	Down
1793	DOCK1	0.934386	8.32021e-05	0.00170455	Up
8563	THOC5	-0.940617	8.52329e-05	0.00174312	Down
81539	SLC38A1	-0.9021	8.72157e-05	0.00176826	Down
54512	EXOSC4	-0.930106	8.78071e-05	0.00177718	Down
26207	PITPNC1	-0.89928	9.07379e-05	0.00183019	Down
5029	P2RY2	-0.939774	9.12757e-05	0.00183788	Down
81563	C1orf21	-0.951785	9.24919e-05	0.001856	Down
57020	C16orf62	0.927079	9.35342e-05	0.00187268	Up
2101	ESRRA	-0.87813	9.36422e-05	0.00187268	Down
57088	PLSCR4	0.912692	9.40063e-05	0.00187677	Up
55327	LIN7C	-0.932729	9.5512e-05	0.00190359	Down
7070	THY1	0.878091	9.67976e-05	0.00191944	Up
283232	TMEM80	0.91367	9.7445e-05	0.00192577	Up
2026	ENO2	0.890296	9.98928e-05	0.00196752	Up
63894	VIPAS39	0.892901	0.00010272	0.00201952	Up
64400	AKTIP	-0.876472	0.000103049	0.00201952	Down
5493	PPL	-0.891465	0.000104525	0.00204163	Down
4599	MX1	0.917166	0.000105262	0.00204907	Up
83716	CRISPLD2	-0.890064	0.00010543	0.00204907	Down
9890	LPPR4	0.87945	0.000107655	0.00208886	Up
23683	PRKD3	-0.909889	0.000115752	0.00223123	Down
11142	PKIG	0.922197	0.000116987	0.00225132	Up
284119	PTRF	0.898623	0.000119072	0.0022877	Up
151987	PPP4R2	-0.915377	0.000119323	0.00228878	Down
5157	PDGFRL	0.901155	0.000120081	0.00229758	Up
1785	DNM2	-0.876623	0.000120173	0.00229758	Down
9334	B4GALT5	-0.940461	0.000125113	0.00237682	Down
10966	RAB40B	0.901898	0.000125127	0.00237682	Up
6637	SNRPG	-0.876452	0.000125998	0.00238948	Down
23595	ORC3	0.914046	0.000127927	0.00241826	Up
55281	TMEM140	0.857347	0.000132109	0.00249328	Up
54107	POLE3	-0.949004	0.000132663	0.00249574	Down
28984	RGCC	-0.891912	0.000138102	0.0025774	Down
10410	IFITM3	-0.870246	0.000142307	0.00264327	Down
4666	NACA	0.854556	0.000143385	0.00265908	Up
26751	SH3YL1	0.868757	0.000143614	0.00265913	Up
8834	TMEM11	-0.861885	0.000144781	0.00267651	Down
51191	HERC5	0.858291	0.000145403	0.00268379	Up
25939	SAMHD1	-0.86693	0.000145984	0.00269028	Down
165	AEBP1	0.857165	0.000147516	0.00271425	Up
23211	ZC3H4	0.876618	0.000149555	0.00274747	Up
4016	LOXL1	0.8902	0.000151971	0.00278749	Up
1495	CTNNA1	-0.856888	0.000155601	0.00283633	Down
171546	SPTSSA	-0.86091	0.000156932	0.00285615	Down
4811	NID1	-0.856639	0.000160139	0.00291003	Down
84302	TMEM246	0.869766	0.000161214	0.00292503	Up
1404	HAPLN1	0.870431	0.000162749	0.00294378	Up
3854	KRT6B	-0.865711	0.00016585	0.00299065	Down
6780	STAU1	0.872654	0.00016651	0.00299795	Up
51304	ZDHHC3	-0.895347	0.000169155	0.0030409	Down
10241	CALCOCO2	-0.860149	0.000169474	0.00304198	Down
51507	RTFDC1	0.87003	0.000169985	0.0030465	Up
25875	LETMD1	0.853081	0.000171491	0.00306722	Up
6654	SOS1	-0.860206	0.000171907	0.00306722	Down
10061	ABCF2	-0.930075	0.000175304	0.00309923	Down
4281	MID1	0.944532	0.000178164	0.00313731	Up
90865	IL33	0.856131	0.000184121	0.00323563	Up
90362	FAM110B	0.848147	0.000187399	0.0032883	Up
22875	ENPP4	-0.858664	0.000188268	0.00329863	Down
64708	COPS7B	0.843982	0.000190597	0.00333445	Up
5128	CDK17	-0.930132	0.000191377	0.00334312	Down
8842	PROM1	0.846976	0.000192431	0.00335654	Up
2875	GPT	-0.848307	0.000195798	0.00339509	Down
3316	HSPB2	-0.856221	0.000198279	0.00342294	Down
6274	S100A3	-0.841277	0.000200009	0.00344774	Down
6397	SEC14L1	-0.843237	0.000203537	0.0035034	Down
55786	ZNF415	0.845573	0.000207045	0.00355337	Up
6529	SLC6A1	0.847974	0.000208742	0.00357727	Up
10536	LEPREL2	0.826855	0.000210078	0.0035949	Up
369	ARAF	-0.845282	0.000211534	0.00360406	Down
56920	SEMA3G	0.833827	0.000212652	0.00361273	Up
1051	CEBPB	-0.897103	0.000212659	0.00361273	Down
6280	S100A9	-0.842153	0.00021542	0.00365437	Down
7726	TRIM26	0.826786	0.000217318	0.00367594	Up
10211	FLOT1	-0.85217	0.000218953	0.00369825	Down
27065	NSG1	-0.845711	0.000219615	0.00370412	Down
6403	SELP	0.846175	0.000221329	0.00372766	Up
55151	TMEM38B	-0.832698	0.000225091	0.00376939	Down
734	OSGIN2	0.869962	0.000226417	0.0037808	Up
23248	RPRD2	0.890872	0.000228597	0.00381179	Up
54951	COMMD8	0.834454	0.000229318	0.00381314	Up
9627	SNCAIP	0.859295	0.000229328	0.00381314	Up
6813	STXBP2	-0.834234	0.000230141	0.00382125	Down
57493	HEG1	0.879876	0.000232305	0.00385174	Up
1643	DDB2	0.859167	0.000233381	0.00386412	Up
9638	FEZ1	0.917429	0.000236694	0.00390246	Up
55689	YEATS2	0.860997	0.000239968	0.00394535	Up
81558	FAM117A	0.895413	0.000245115	0.00401872	Up
11160	ERLIN2	0.855376	0.000246569	0.00403693	Up
5764	PTN	0.819603	0.000249519	0.00407385	Up
6840	SVIL	0.847574	0.000250522	0.00408456	Up
79042	TSEN34	0.846055	0.000255233	0.00413837	Up
729515	TMEM242	0.843438	0.000258323	0.00418269	Up
79868	ALG13	0.815183	0.000259104	0.00418957	Up
58529	MYOZ1	0.877722	0.000261948	0.00422392	Up
8019	BRD3	0.823367	0.000264988	0.00426708	Up
54842	MFSD6	-0.816864	0.000266106	0.00427335	Down
2935	GSPT1	-0.831641	0.000272822	0.00436924	Down
23095	KIF1B	-0.86647	0.000277366	0.00443597	Down
5223	PGAM1	0.82463	0.000278726	0.00445165	Up
8125	ANP32A	0.828055	0.000291311	0.00462817	Up
3977	LIFR	-0.806477	0.000298426	0.00471523	Down
79933	SYNPO2L	0.837897	0.000298443	0.00471523	Up
6744	SSFA2	-0.854061	0.00030267	0.0047756	Down
51367	POP5	0.830641	0.000305419	0.00480605	Up
64927	TTC23	0.829837	0.000306345	0.00481416	Up
9358	ITGBL1	0.804769	0.000306884	0.00481619	Up
1523	CUX1	0.82554	0.00031023	0.0048622	Up
4311	MME	0.815147	0.000314508	0.00491612	Up
2530	FUT8	0.827576	0.000315075	0.00491844	Up
51295	ECSIT	-0.838121	0.000315894	0.00492468	Down
2896	GRN	0.832973	0.000323522	0.00502674	Up
9904	RBM19	-0.874022	0.000323925	0.00502674	Down
10657	KHDRBS1	0.820258	0.000325377	0.00503905	Up
3482	IGF2R	-0.805937	0.000325946	0.00504121	Down
80762	NDFIP1	0.837356	0.000332087	0.00511598	Up
284325	C19orf54	0.860952	0.00033404	0.00513931	Up
10274	STAG1	-0.820187	0.00034912	0.00535728	Down
28955	DEXI	-0.800709	0.000352297	0.00539897	Down
55107	ANO1	0.79638	0.000353592	0.00540471	Up
306	ANXA3	-0.846109	0.00036365	0.00555122	Down
8503	PIK3R3	-0.857434	0.000370325	0.00563836	Down
27173	SLC39A1	-0.816294	0.0003708	0.00563836	Down
55612	FERMT1	0.810854	0.000371309	0.0056388	Up
9658	ZNF516	0.836348	0.000371829	0.00563941	Up
5612	PRKRIR	0.827657	0.000384978	0.00582379	Up
51001	MTERF3	-0.796693	0.000394026	0.00594154	Down
7316	UBC	-0.863193	0.00039428	0.00594154	Down
10226	PLIN3	-0.842032	0.000395238	0.0059435	Down
2099	ESR1	0.868581	0.000395423	0.0059435	Up
439921	MXRA7	0.798025	0.000397945	0.00597376	Up
58473	PLEKHB1	0.788738	0.000408293	0.00612126	Up
1674	DES	-0.788165	0.000410806	0.00614656	Down
10671	DCTN6	0.797977	0.000411551	0.00614656	Up
83714	NRIP2	0.78239	0.000421615	0.00628088	Up
1959	EGR2	0.788909	0.000428112	0.00636152	Up
26011	TENM4	0.849851	0.000434275	0.00644495	Up
9367	RAB9A	-0.873421	0.000436759	0.00646754	Down
9690	UBE3C	-0.860316	0.000438611	0.00648471	Down
8864	PER2	0.797431	0.000451203	0.00664577	Up
10631	POSTN	0.804619	0.000454212	0.00667333	Up
64766	S100PBP	0.837464	0.000461669	0.00677442	Up
115207	KCTD12	-0.799931	0.000464911	0.00681347	Down
4603	MYBL1	0.832102	0.000465592	0.00681495	Up
78986	DUSP26	0.781832	0.000470474	0.00686927	Up
23786	BCL2L13	-0.79109	0.000473551	0.0069056	Down
29115	SAP30BP	-0.842582	0.000481469	0.00699501	Down
29937	NENF	0.779853	0.000488004	0.00706372	Up
9909	DENND4B	-0.772504	0.000491283	0.00709499	Down
55353	LAPTM4B	0.823829	0.000491803	0.00709499	Up
84168	ANTXR1	0.771579	0.000492582	0.00709499	Up
7314	UBB	0.785776	0.000502472	0.00721972	Up
594	BCKDHB	-0.769011	0.000506827	0.00726658	Down
4357	MPST	-0.804563	0.00050697	0.00726658	Down
5894	RAF1	-0.796293	0.000507765	0.00726909	Down
9308	CD83	0.788422	0.00051173	0.00731693	Up
64960	MRPS15	-0.773954	0.000512928	0.00732514	Down
29078	NDUFAF4	-0.80317	0.00051363	0.00732624	Down
57523	NYNRIN	0.821858	0.000518736	0.00739009	Up
93210	PGAP3	0.789608	0.000523754	0.00744546	Up
3459	IFNGR1	-0.785011	0.00052389	0.00744546	Down
55277	FGGY	0.814117	0.000525694	0.00746206	Up
1393	CRHBP	0.778783	0.000526614	0.00746609	Up
64081	PBLD	0.81267	0.000527861	0.00747473	Up
10581	IFITM2	-0.804859	0.000532592	0.00753265	Down
3660	IRF2	0.783153	0.000535724	0.00756072	Up
2662	GDF10	0.773625	0.000535865	0.00756072	Up
83439	TCF7L1	0.814459	0.000541842	0.00762671	Up
1737	DLAT	-0.777929	0.00056013	0.00783715	Down
2802	GOLGA3	0.794499	0.000561205	0.00784155	Up
8623	ASMTL	0.849285	0.00056178	0.00784155	Up
7580	ZNF32	-0.786506	0.000575892	0.00802898	Down
818	CAMK2G	0.821573	0.000583135	0.00811958	Up
5702	PSMC3	-0.789084	0.000584397	0.00811958	Down
26037	SIPA1L1	0.775645	0.000588972	0.00816134	Up
9230	RAB11B	0.779282	0.000589557	0.00816134	Up
2983	GUCY1B3	0.845455	0.000591571	0.00816994	Up
1289	COL5A1	0.762745	0.000597357	0.00822884	Up
29994	BAZ2B	0.819807	0.000602926	0.00827807	Up
1909	EDNRA	0.77828	0.000610789	0.00833862	Up
6817	SULT1A1	0.805229	0.000610888	0.00833862	Up
10384	BTN3A3	0.844335	0.000617921	0.00839639	Up
23102	TBC1D2B	0.766355	0.000617981	0.00839639	Up
8692	HYAL2	-0.852238	0.000620909	0.00842642	Down
23348	DOCK9	-0.778863	0.000629199	0.00851923	Down
83937	RASSF4	-0.820004	0.000636145	0.00858166	Down
4953	ODC1	0.759705	0.000636735	0.00858166	Up
23765	IL17RA	-0.765926	0.000640113	0.00861562	Down
8544	PIR	-0.806655	0.000642423	0.0086286	Down
79154	DHRS11	0.761003	0.000644583	0.00864773	Up
57820	CCNB1IP1	-0.809066	0.00065026	0.00871198	Down
6445	SGCG	0.783853	0.000650857	0.00871198	Up
2949	GSTM5	0.766823	0.000653051	0.0087314	Up
307	ANXA4	0.756816	0.000653892	0.00873269	Up
23170	TTLL12	-0.820647	0.000656097	0.00874613	Down
55823	VPS11	0.786862	0.000657016	0.00874613	Up
9547	CXCL14	0.800535	0.000658057	0.00874851	Up
8615	USO1	-0.79089	0.00065927	0.00875139	Down
4047	LSS	-0.772101	0.000659765	0.00875139	Down
64943	NT5DC2	-0.818457	0.000672799	0.00889653	Down
3687	ITGAX	0.81953	0.000675348	0.00890598	Up
55384	MEG3	0.812316	0.000676904	0.00890598	Up
8674	VAMP4	-0.779037	0.000677489	0.00890598	Down
27095	TRAPPC3	-0.789162	0.000678686	0.00891016	Down
1196	CLK2	0.76609	0.000682997	0.00894833	Up
8533	COPS3	-0.784768	0.000685309	0.00895862	Down
8554	PIAS1	-0.750095	0.000695581	0.0090722	Down
563	AZGP1	-0.777405	0.000710212	0.00923276	Down
6624	FSCN1	0.761067	0.00071146	0.00923875	Up
1070	CETN3	0.783867	0.000714338	0.00926587	Up
54796	BNC2	0.775374	0.000715571	0.00927162	Up
11092	C9orf9	0.778514	0.000718399	0.009298	Up
10248	POP7	-0.758914	0.0007218	0.00933173	Down
5430	POLR2A	0.75465	0.000723662	0.00934551	Up
1153	CIRBP	0.770338	0.000729038	0.00939427	Up
26472	PPP1R14B	-0.761749	0.000743943	0.00957582	Down
56255	TMX4	-0.766882	0.000746568	0.00959908	Down
2040	STOM	-0.797762	0.000753387	0.00966935	Down
26071	FAM127B	-0.743564	0.000753681	0.00966935	Down
4552	MTRR	-0.795703	0.000761191	0.00975505	Down
219699	UNC5B	0.757744	0.000768067	0.00982172	Up
51339	DACT1	0.741204	0.000771213	0.00985122	Up
5538	PPT1	0.772581	0.000772262	0.00985143	Up
8613	PPAP2B	-0.741077	0.000772908	0.00985143	Down
7045	TGFBI	0.755712	0.000787306	0.00999155	Up
9209	LRRFIP2	-0.740863	0.000793852	0.0100637	Down
55133	SRBD1	0.809965	0.000803697	0.0101666	Up
54856	GON4L	0.767486	0.000816387	0.010316	Up
8751	ADAM15	-0.752575	0.000819114	0.0103393	Down
11170	FAM107A	-0.758251	0.000827709	0.0104366	Down
11171	STRAP	-0.783482	0.00083014	0.0104448	Down
23788	MTCH2	-0.776347	0.000841899	0.0105814	Down
79805	VASH2	-0.735848	0.000845461	0.0106035	Down
7059	THBS3	0.742848	0.000851581	0.0106575	Up
3791	KDR	-0.748122	0.000857567	0.010721	Down
57198	ATP8B2	0.741835	0.00086022	0.010731	Up
23220	DTX4	0.7516	0.00086085	0.010731	Up
79733	E2F8	-0.79471	0.000862029	0.010731	Down
80019	UBTD1	-0.762047	0.000870166	0.0108119	Down
7561	ZNF14	0.740623	0.000870371	0.0108119	Up
29098	RANGRF	-0.809378	0.000878775	0.0108818	Down
2202	EFEMP1	0.740788	0.000880442	0.010891	Up
55070	DET1	0.779488	0.00088587	0.0109466	Up
10589	DRAP1	-0.747321	0.000894366	0.0110111	Down
25839	COG4	0.763484	0.000894598	0.0110111	Up
54968	TMEM70	-0.762529	0.000894846	0.0110111	Down
1316	KLF6	-0.796957	0.000908231	0.0111408	Down
29906	ST8SIA5	0.755545	0.000915925	0.0112234	Up
6659	SOX4	0.74613	0.000930342	0.0113647	Up
83451	ABHD11	0.743427	0.00093036	0.0113647	Up
23333	DPY19L1	-0.744129	0.000938592	0.0114415	Down
27141	CIDEB	0.771191	0.000941987	0.0114598	Up
3149	HMGB3	0.770207	0.00094205	0.0114598	Up
22795	NID2	0.806039	0.000950547	0.0115389	Up
51373	MRPS17	-0.757986	0.000951502	0.0115389	Down
103	ADAR	0.77134	0.00096576	0.0116877	Up
10114	HIPK3	-0.751857	0.000973378	0.0117556	Down
80271	ITPKC	-0.741125	0.000993551	0.0119501	Down
654	BMP6	0.736927	0.000998687	0.0119996	Up
23596	OPN3	-0.779124	0.00100148	0.0120208	Down
5822	PWP2	-0.777806	0.00101068	0.0120799	Down
6208	RPS14	-0.733107	0.00101155	0.0120799	Down
5425	POLD2	-0.797461	0.00104483	0.0124337	Down
22937	SCAP	-0.733346	0.00104541	0.0124337	Down
2534	FYN	0.758847	0.00108589	0.0128631	Up
28954	REM1	0.741263	0.00109114	0.0128992	Up
51109	RDH11	0.720204	0.00109975	0.0129748	Up
27043	PELP1	0.727014	0.00111066	0.0130773	Up
2872	MKNK2	-0.764812	0.00111833	0.0131413	Down
9254	CACNA2D2	0.782584	0.00113621	0.0132989	Up
4189	DNAJB9	-0.754784	0.00113854	0.0132989	Down
1760	DMPK	-0.764361	0.00114626	0.0133625	Down
9885	OSBPL2	0.76724	0.00115159	0.0134112	Up
6678	SPARC	0.741246	0.00115961	0.013468	Up
57599	WDR48	0.729277	0.00116232	0.013468	Up
5607	MAP2K5	0.738439	0.00116867	0.013488	Up
4676	NAP1L4	0.714144	0.00116891	0.013488	Up
2670	GFAP	0.7402	0.00116967	0.013488	Up
3895	KTN1	-0.746452	0.00117877	0.0135795	Down
4642	MYO1D	0.711276	0.0011853	0.013628	Up
419	ART3	-0.900374	0.00119526	0.0137157	Down
3150	HMGN1	0.716467	0.00121058	0.0138509	Up
390616	ANKRD34C	0.743484	0.00121264	0.013861	Up
115817	DHRS1	0.738073	0.0012202	0.0139202	Up
5125	PCSK5	0.71939	0.00122892	0.013979	Up
55837	EAPP	0.733749	0.00123766	0.0140648	Up
3274	HRH2	-0.725822	0.00123978	0.0140753	Down
9580	SOX13	0.774512	0.00124246	0.014092	Up
3775	KCNK1	-0.749065	0.00125267	0.0141941	Down
388969	C2orf68	0.770841	0.0012572	0.0142317	Up
55908	C19orf80	-0.746184	0.00125881	0.0142363	Down
2551	GABPA	-0.737731	0.00126107	0.014248	Down
25797	QPCT	0.711558	0.00127143	0.0143375	Up
1290	COL5A2	0.722782	0.00127357	0.0143479	Up
1120	CHKB	0.781621	0.00127746	0.0143778	Up
27306	HPGDS	0.799194	0.0012791	0.0143825	Up
3251	HPRT1	0.70875	0.00129155	0.0144948	Up
23244	PDS5A	-0.739793	0.0013094	0.014667	Down
26135	SERBP1	-0.788046	0.00131603	0.0147272	Down
5287	PIK3C2B	0.731108	0.00132011	0.0147588	Up
11334	TUSC2	-0.753506	0.00132192	0.0147646	Down
1017	CDK2	-0.759087	0.00132314	0.0147646	Down
80746	TSEN2	-0.710681	0.00132738	0.0147838	Down
5583	PRKCH	-0.738527	0.00132946	0.014793	Down
4238	MFAP3	-0.77776	0.00133234	0.0148109	Down
5718	PSMD12	-0.783231	0.0013362	0.0148397	Down
4157	MC1R	0.732023	0.00134636	0.0149243	Up
896	CCND3	-0.724401	0.00136463	0.0150983	Down
7430	EZR	-0.749833	0.00137797	0.0152173	Down
10763	NES	0.701144	0.0013961	0.0153598	Up
1147	CHUK	-0.766157	0.00140414	0.0154337	Down
26152	ZNF337	0.729013	0.00141471	0.0155208	Up
9905	SGSM2	0.723701	0.00141805	0.0155429	Up
819	CAMLG	0.717074	0.00143025	0.0156409	Up
55769	ZNF83	0.69933	0.00143199	0.0156409	Up
1958	EGR1	0.745697	0.00143232	0.0156409	Up
3192	HNRNPU	-0.774658	0.00143536	0.0156595	Down
30819	KCNIP2	-0.707287	0.00143695	0.0156624	Down
26576	SRPK3	0.751324	0.00144948	0.015755	Up
9902	MRC2	0.70969	0.00145164	0.015764	Up
23259	DDHD2	0.775107	0.00146547	0.0158847	Up
1027	CDKN1B	0.721586	0.0014728	0.0159347	Up
3073	HEXA	0.722745	0.00150163	0.0162144	Up
10653	SPINT2	0.715257	0.00151921	0.0163465	Up
1573	CYP2J2	0.725709	0.00152146	0.0163557	Up
9604	RNF14	-0.743609	0.00153025	0.0164352	Down
22874	PLEKHA6	0.732254	0.0015329	0.0164486	Up
2627	GATA6	0.699268	0.00154148	0.0165104	Up
25903	OLFML2B	0.697416	0.00154502	0.0165333	Up
4752	NEK3	0.704989	0.0015516	0.0165886	Up
1058	CENPA	0.722221	0.00155452	0.0165895	Up
6921	TCEB1	-0.738577	0.00156217	0.016656	Down
6926	TBX3	-0.702871	0.00156466	0.0166675	Down
5049	PAFAH1B2	0.724719	0.00157434	0.0167402	Up
5728	PTEN	-0.720202	0.00157727	0.0167562	Down
8703	B4GALT3	-0.762235	0.00158643	0.0168382	Down
10266	RAMP2	0.732655	0.0015924	0.0168741	Up
5547	PRCP	0.700518	0.00159269	0.0168741	Up
5465	PPARA	-0.711358	0.00159809	0.0169161	Down
6128	RPL6	-0.747958	0.00161102	0.0170376	Down
51075	TMX2	-0.714759	0.00162072	0.0171248	Down
84193	SETD3	0.734038	0.00162327	0.0171343	Up
5358	PLS3	0.723677	0.00165454	0.0174177	Up
5286	PIK3C2A	-0.711164	0.00165586	0.0174177	Down
3426	CFI	0.703131	0.00166451	0.0174784	Up
950	SCARB2	-0.786378	0.00166461	0.0174784	Down
7424	VEGFC	0.711754	0.0016695	0.0175031	Up
2195	FAT1	0.730635	0.00169095	0.0176759	Up
8776	MTMR1	-0.764432	0.00170224	0.0177623	Down
26145	IRF2BP1	0.724919	0.00171398	0.0178689	Up
5875	RABGGTA	-0.695421	0.0017362	0.0180206	Down
27351	DESI1	-0.70544	0.00174989	0.0181466	Down
10634	GAS2L1	-0.69313	0.00176211	0.0182572	Down
9973	CCS	0.72721	0.00176885	0.0183109	Up
331	XIAP	-0.726404	0.00178337	0.0184125	Down
3094	HINT1	-0.686402	0.00182955	0.0188561	Down
11215	AKAP11	0.739292	0.0018352	0.0188977	Up
4012	LNPEP	-0.77064	0.00184211	0.0189467	Down
29799	YPEL1	0.694028	0.0018435	0.0189467	Up
55120	FANCL	0.703928	0.00184529	0.0189467	Up
8888	MCM3AP	-0.703888	0.00184733	0.0189467	Down
5546	PRCC	-0.743853	0.00184803	0.0189467	Down
3757	KCNH2	-0.693791	0.00185167	0.0189654	Down
10362	HMG20B	-0.734718	0.00185308	0.0189654	Down
6548	SLC9A1	0.839249	0.00186323	0.019036	Up
7009	TMBIM6	-0.729692	0.00186752	0.0190633	Down
26873	OPLAH	-0.753672	0.00188892	0.0192483	Down
4121	MAN1A1	-0.698031	0.00189674	0.0193112	Down
10497	UNC13B	-0.676152	0.00190022	0.0193258	Down
7033	TFF3	0.683709	0.00191113	0.0194073	Up
273	AMPH	0.742723	0.00191593	0.0194392	Up
10924	SMPDL3A	-0.713421	0.00192028	0.0194563	Down
9945	GFPT2	-0.741846	0.001924	0.0194706	Down
10026	PIGK	0.746343	0.00192892	0.0195001	Up
81533	ITFG1	0.732012	0.00193356	0.0195001	Up
25827	FBXL2	0.703749	0.00193932	0.0195191	Up
9246	UBE2L6	0.697865	0.00194043	0.0195191	Up
54386	TERF2IP	0.732428	0.00194613	0.0195435	Up
7170	TPM3	0.683828	0.00194619	0.0195435	Up
8192	CLPP	-0.675826	0.00195253	0.0195737	Down
10799	RPP40	-0.697646	0.00197972	0.0198124	Down
9373	PLAA	-0.734943	0.00199157	0.0198971	Down
7879	RAB7A	-0.733862	0.00199668	0.0199311	Down
22891	ZNF365	0.671943	0.00201003	0.0200473	Up
5691	PSMB3	-0.710477	0.00203488	0.0202722	Down
4130	MAP1A	0.684761	0.00203791	0.0202722	Up
54726	OTUD4	-0.695741	0.0020412	0.0202722	Down
81894	SLC25A28	-0.731707	0.00206734	0.0205143	Down
3357	HTR2B	0.701377	0.00207221	0.0205453	Up
8786	RGS11	0.692273	0.00207633	0.0205688	Up
290	ANPEP	-0.684935	0.00208013	0.0205891	Down
7108	TM7SF2	0.720017	0.00208219	0.0205921	Up
3550	IK	0.693192	0.00208986	0.0206505	Up
63941	NECAB3	0.700128	0.00210496	0.0207823	Up
29984	RHOD	-0.70563	0.00210691	0.020784	Down
10052	GJC1	-0.714049	0.00212637	0.0209584	Down
4681	NBL1	0.685584	0.00213068	0.0209832	Up
3313	HSPA9	-0.747116	0.00213974	0.0210372	Down
23608	MKRN1	0.727756	0.00214602	0.0210813	Up
11341	SCRG1	0.683947	0.00215505	0.0211414	Up
5436	POLR2G	0.684099	0.00215575	0.0211414	Up
3741	KCNA5	0.741785	0.00216532	0.0212148	Up
439	ASNA1	-0.692939	0.00216684	0.0212148	Down
2159	F10	0.68727	0.00217784	0.0212732	Up
6810	STX4	-0.722217	0.00217825	0.0212732	Down
11143	KAT7	0.686056	0.00220114	0.0214789	Up
3745	KCNB1	-0.690693	0.0022069	0.0215173	Down
57134	MAN1C1	0.742974	0.00221252	0.0215541	Up
10269	ZMPSTE24	-0.689538	0.00221695	0.0215794	Down
114885	OSBPL11	-0.670849	0.002229	0.0216608	Down
4904	YBX1	-0.668465	0.00223309	0.0216825	Down
56986	DTWD1	-0.700183	0.00224391	0.0217696	Down
30968	STOML2	-0.667892	0.00224922	0.0218031	Down
29855	UBN1	-0.682887	0.00226444	0.0219178	Down
1178	CLC	0.755326	0.00227117	0.0219615	Up
5552	SRGN	-0.706502	0.00227319	0.0219629	Down
51617	HMP19	0.703412	0.00229487	0.0221542	Up
10195	ALG3	-0.692153	0.00231568	0.0223367	Down
1583	CYP11A1	0.676468	0.00232454	0.0224037	Up
8348	HIST1H2BO	-0.708404	0.00235884	0.0226744	Down
847	CAT	0.717096	0.00236049	0.0226744	Up
23240	KIAA0922	0.721238	0.00240359	0.0229766	Up
7091	TLE4	0.658417	0.00240551	0.0229766	Up
5733	PTGER3	-0.700091	0.00242966	0.0231666	Down
1356	CP	0.676214	0.00247177	0.023488	Up
2585	GALK2	-0.685652	0.00247659	0.0235025	Down
23098	SARM1	0.655356	0.00248937	0.0236039	Up
310	ANXA7	0.654854	0.00249965	0.0236641	Up
11248	NXPH3	0.72183	0.00250406	0.0236867	Up
9060	PAPSS2	-0.674003	0.00251098	0.0237269	Down
11193	WBP4	-0.671134	0.00251721	0.0237536	Down
54681	P4HTM	0.679727	0.00254949	0.0240074	Up
23173	METAP1	-0.670684	0.00255023	0.0240074	Down
8243	SMC1A	-0.671129	0.00257162	0.0241506	Down
1805	DPT	0.668563	0.00258581	0.0242645	Up
9881	TRANK1	0.660483	0.00260196	0.0243794	Up
23066	CAND2	0.714808	0.00260222	0.0243794	Up
80267	EDEM3	-0.695572	0.00262804	0.0245772	Down
4211	MEIS1	-0.71669	0.00262859	0.0245772	Down
3911	LAMA5	-0.742557	0.00262961	0.0245772	Down
100130958	SYCE1L	0.708586	0.00264104	0.0246644	Up
64398	MPP5	-0.694417	0.00264536	0.0246851	Down
7414	VCL	-0.679881	0.00266512	0.0248104	Down
7188	TRAF5	0.708461	0.00269146	0.0249961	Up
5861	RAB1A	-0.712635	0.00270288	0.0250823	Down
55505	NOP10	-0.668812	0.00271389	0.0251447	Down
6415	SEPW1	-0.673728	0.00273745	0.025343	Down
5311	PKD2	0.652673	0.00276041	0.0255354	Up
655	BMP7	-0.661356	0.00276622	0.0255489	Down
5532	PPP3CB	0.695476	0.00279926	0.0258134	Up
65979	PHACTR4	-0.681488	0.00282551	0.0259942	Down
27295	PDLIM3	0.650149	0.00282791	0.025996	Up
1809	DPYSL3	0.652413	0.00283324	0.0260245	Up
3479	IGF1	0.667161	0.00283706	0.0260393	Up
9322	TRIP10	-0.668834	0.00284755	0.0261113	Down
84818	IL17RC	-0.670782	0.00288064	0.0263569	Down
54811	ZNF562	-0.700963	0.00288991	0.0264211	Down
5271	SERPINB8	-0.679983	0.00290055	0.0264771	Down
285282	RABL3	0.690634	0.00292534	0.0266826	Up
9391	CIAO1	-0.706299	0.00295627	0.026923	Down
1069	CETN2	0.675201	0.00296626	0.026993	Up
5378	PMS1	0.710068	0.00297984	0.0270955	Up
6663	SOX10	-0.641262	0.00299232	0.027188	Down
23030	KDM4B	-0.653835	0.00299632	0.0272032	Down
10084	PQBP1	-0.657219	0.00300112	0.0272257	Down
5711	PSMD5	-0.69056	0.00304016	0.027495	Down
2799	GNS	-0.659569	0.00304393	0.0275079	Down
5226	PGD	-0.706165	0.00307454	0.0277631	Down
51704	GPRC5B	-0.641553	0.00309205	0.0278783	Down
3490	IGFBP7	0.67267	0.00310028	0.027931	Up
1979	EIF4EBP2	-0.647506	0.00310311	0.0279351	Down
65009	NDRG4	-0.662447	0.00317976	0.0285594	Down
4893	NRAS	-0.664752	0.00318719	0.0286043	Down
7704	ZBTB16	-0.658401	0.00321625	0.0287991	Down
56906	THAP10	0.655864	0.00322926	0.0288913	Up
1649	DDIT3	0.651606	0.00323147	0.0288913	Up
5300	PIN1	0.689486	0.00324801	0.0289949	Up
51071	DERA	-0.641716	0.00328382	0.0292257	Down
541578	CXorf40B	-0.69076	0.00329785	0.0293284	Down
79582	SPAG16	0.671622	0.00331133	0.0294259	Up
79683	ZDHHC14	0.640827	0.00331781	0.0294457	Up
11345	GABARAPL2	0.638442	0.00331857	0.0294457	Up
25847	ANAPC13	0.670287	0.00332494	0.0294577	Up
25814	ATXN10	0.6781	0.00333432	0.0295118	Up
2222	FDFT1	0.666203	0.00333607	0.0295118	Up
9719	ADAMTSL2	0.640751	0.00334097	0.0295329	Up
23438	HARS2	0.646068	0.00336713	0.0297194	Up
80127	CCDC176	0.667533	0.00337824	0.0297743	Up
91137	SLC25A46	-0.649852	0.0033843	0.0298037	Down
1107	CHD3	0.67593	0.00341579	0.0300359	Up
23366	KIAA0895	-0.648907	0.00342721	0.0301013	Down
26286	ARFGAP3	-0.69616	0.00342835	0.0301013	Down
7705	ZNF146	-0.657378	0.00343385	0.030127	Down
50507	NOX4	0.630524	0.00344192	0.0301753	Up
51678	MPP6	-0.667308	0.00345046	0.0302167	Down
686	BTD	0.654995	0.00346434	0.0303039	Up
5051	PAFAH2	0.642964	0.00347141	0.0303431	Up
79694	MANEA	-0.668801	0.00349995	0.0305471	Down
9839	ZEB2	0.675994	0.00350644	0.030581	Up
8295	TRRAP	0.674016	0.00351649	0.0306459	Up
3728	JUP	-0.689914	0.00358668	0.0310963	Down
6610	SMPD2	-0.656936	0.00358671	0.0310963	Down
5475	PPEF1	-0.635684	0.00361164	0.0312663	Down
8123	PWAR5	-0.693536	0.00363638	0.0314541	Down
5420	PODXL	-0.645057	0.0036387	0.0314541	Down
7988	ZNF212	0.629201	0.00366612	0.0316446	Up
1482	NKX2-5	-0.655705	0.00370196	0.031907	Down
2971	GTF3A	-0.661042	0.00371919	0.032032	Down
79673	ZNF329	0.665912	0.0037399	0.0321542	Up
6500	SKP1	0.63655	0.00376887	0.0322677	Up
26504	CNNM4	0.654871	0.00377338	0.0322677	Up
51435	SCARA3	0.633924	0.00377404	0.0322677	Up
29899	GPSM2	-0.632244	0.00379214	0.0323735	Down
28971	AAMDC	-0.637203	0.00381498	0.0325229	Down
2690	GHR	0.678739	0.00382191	0.0325584	Up
9868	TOMM70A	-0.64717	0.0038578	0.0328165	Down
8292	COLQ	0.649742	0.00388776	0.0329995	Up
10557	RPP38	-0.649484	0.00390718	0.033105	Down
1687	DFNA5	0.626589	0.00390889	0.033105	Up
5073	PARN	0.634642	0.00391146	0.033105	Up
79651	RHBDF2	-0.632645	0.00391769	0.0331338	Down
2826	CCR10	0.649566	0.00393624	0.0332668	Up
3059	HCLS1	-0.650594	0.00395888	0.0334341	Down
8560	DEGS1	-0.625224	0.00400085	0.0336761	Down
64981	MRPL34	-0.620783	0.00400817	0.0337048	Down
1778	DYNC1H1	0.683179	0.00402222	0.0337745	Up
4891	SLC11A2	-0.642904	0.00404102	0.033884	Down
6005	RHAG	-0.619316	0.00406279	0.0340179	Down
80169	CTC1	0.660448	0.00409401	0.0341857	Up
11253	MAN1B1	0.649577	0.00409901	0.0341857	Up
59338	PLEKHA1	-0.665448	0.00413915	0.0344607	Down
4358	MPV17	0.6181	0.00415324	0.0345535	Up
7220	TRPC1	0.67806	0.00418982	0.0348331	Up
6045	RNF2	0.65836	0.0042011	0.0348994	Up
26234	FBXL5	-0.700201	0.00421074	0.0349328	Down
6183	MRPS12	-0.692771	0.00422765	0.0350235	Down
9122	SLC16A4	0.654037	0.00423856	0.0350892	Up
7905	REEP5	-0.643627	0.0042601	0.0352259	Down
26523	AGO1	0.68759	0.00426107	0.0352259	Up
5501	PPP1CC	-0.615849	0.00427802	0.0353401	Down
25941	TPGS2	0.643367	0.00428767	0.0353501	Up
5791	PTPRE	-0.698021	0.00429372	0.0353712	Down
10867	TSPAN9	0.627698	0.00429951	0.0353941	Up
2205	FCER1A	0.680156	0.00438314	0.0359816	Up
5919	RARRES2	0.660976	0.00439871	0.0360842	Up
54830	NUP62CL	0.630825	0.00441719	0.0362105	Up
8218	CLTCL1	0.627054	0.00443523	0.0363077	Up
23508	TTC9	0.648258	0.00447864	0.0366374	Up
28986	MAGEH1	0.618132	0.004485	0.0366639	Up
55601	DDX60	0.624418	0.00449169	0.0366826	Up
2766	GMPR	-0.618362	0.00449389	0.0366826	Down
22846	VASH1	0.625618	0.00449665	0.0366826	Up
122616	C14orf79	0.617288	0.00453085	0.0369131	Up
8702	B4GALT4	-0.670856	0.0045312	0.0369131	Down
4045	LSAMP	-0.628285	0.00454294	0.0369831	Down
91543	RSAD2	0.652379	0.0045495	0.0370108	Up
10277	UBE4B	-0.62543	0.00455647	0.0370419	Down
4729	NDUFV2	-0.61542	0.0045659	0.037079	Down
140460	ASB7	0.665332	0.00457368	0.037079	Up
55214	LEPREL1	0.61072	0.00459699	0.0372423	Up
80305	TRABD	-0.661079	0.0046031	0.0372661	Down
26175	TMEM251	-0.63525	0.00462172	0.037391	Down
1382	CRABP2	0.60677	0.00469301	0.0378114	Up
9513	FXR2	-0.607733	0.00469823	0.0378275	Down
57099	AVEN	-0.658038	0.00470208	0.0378326	Down
4653	MYOC	0.62946	0.00473261	0.0379794	Up
79785	RERGL	0.631902	0.00475242	0.038081	Up
10298	PAK4	0.632792	0.00476346	0.0381434	Up
4803	NGF	-0.617248	0.004778	0.0382299	Down
9379	NRXN2	0.610742	0.00478078	0.0382299	Up
8731	RNMT	0.617622	0.00482339	0.038492	Up
90411	MCFD2	-0.686801	0.00482711	0.0384956	Down
5886	RAD23A	-0.637893	0.00484253	0.0385661	Down
10791	VAMP5	-0.648334	0.00485181	0.0386139	Down
4217	MAP3K5	-0.610408	0.00486479	0.0386647	Down
51101	ZC2HC1A	0.620989	0.00488692	0.0388143	Up
7525	YES1	-0.649427	0.00489388	0.0388433	Down
29956	CERS2	-0.669138	0.00491323	0.0389705	Down
670	BPHL	0.634737	0.00495506	0.0392724	Up
64755	C16orf58	0.602519	0.00495798	0.0392724	Up
51409	HEMK1	0.603341	0.00496659	0.0393141	Up
4092	SMAD7	0.623601	0.00497464	0.0393513	Up
10404	CPQ	0.640614	0.00499043	0.0394496	Up
1462	VCAN	0.618604	0.00503461	0.0397638	Up
54960	GEMIN8	0.608527	0.00503696	0.0397638	Up
94	ACVRL1	-0.600636	0.00505621	0.0398622	Down
5441	POLR2L	-0.682597	0.00510537	0.0401834	Down
55203	LGI2	0.644095	0.0051167	0.040231	Up
376412	RNF126P1	-0.620264	0.00512143	0.0402413	Down
9857	CEP350	-0.630816	0.0051367	0.0403343	Down
9630	GNA14	0.620226	0.00514577	0.0403548	Up
23355	VPS8	0.627592	0.00519315	0.0405874	Up
79017	GGCT	-0.638341	0.00521831	0.0407299	Down
80124	VCPIP1	-0.657945	0.00523983	0.0408707	Down
9040	UBE2M	-0.618039	0.00530131	0.0411968	Down
1296	COL8A2	0.622643	0.00537233	0.041584	Up
79891	ZNF671	0.638536	0.00537378	0.041584	Up
56005	C19orf10	-0.669585	0.00538034	0.0416072	Down
60489	APOBEC3G	0.622499	0.00539612	0.0417018	Up
7410	VAV2	0.616569	0.00541618	0.0418018	Up
2207	FCER1G	-0.652238	0.0054493	0.0419825	Down
9716	AQR	-0.624371	0.00545747	0.0419825	Down
2073	ERCC5	0.612751	0.0054628	0.0419959	Up
64419	MTMR14	-0.618416	0.00549086	0.0421568	Down
4054	LTBP3	0.615013	0.00550204	0.0421681	Up
834	CASP1	0.630061	0.00552329	0.0422948	Up
952	CD38	-0.607075	0.0056019	0.0427573	Down
7805	LAPTM5	-0.645418	0.00564542	0.0430056	Down
27123	DKK2	0.622404	0.00566601	0.0431344	Up
11322	TMC6	0.666638	0.00567486	0.0431738	Up
6938	TCF12	0.623127	0.00575148	0.0436587	Up
8448	DOC2A	0.639318	0.00576127	0.0436896	Up
6447	SCG5	0.624149	0.0057806	0.0438079	Up
10645	CAMKK2	0.630756	0.00578818	0.0438088	Up
51309	ARMCX1	0.634949	0.00580937	0.0439408	Up
4340	MOG	-0.594923	0.00583074	0.0440741	Down
1593	CYP27A1	0.609383	0.00584619	0.0441624	Up
1040	CDS1	-0.625917	0.00585783	0.0441935	Down
26053	AUTS2	0.651171	0.00587285	0.0442783	Up
29914	UBIAD1	-0.664814	0.00591543	0.0445136	Down
55003	PAK1IP1	-0.629563	0.00592151	0.0445308	Down
6228	RPS23	-0.60162	0.00594288	0.0446135	Down
5372	PMM1	0.6062	0.00594771	0.0446135	Up
51066	SSUH2	0.613234	0.00598823	0.0448601	Up
5376	PMP22	-0.601087	0.00601109	0.0450027	Down
81556	VWA9	0.593401	0.00602595	0.0450565	Up
6376	CX3CL1	0.635447	0.00611699	0.04565	Up
1300	COL10A1	0.621182	0.0061288	0.04568	Up
761	CA3	0.639337	0.00613848	0.0457231	Up
63897	HEATR6	0.607648	0.00619355	0.0460748	Up
23303	KIF13B	0.605921	0.00622097	0.0462495	Up
54149	C21orf91	0.592652	0.00624141	0.0463186	Up
9263	STK17A	-0.659129	0.00629871	0.04662	Down
1295	COL8A1	0.627504	0.00630221	0.04662	Up
10561	IFI44	0.613866	0.00630257	0.04662	Up
79096	C11orf49	0.590298	0.00631435	0.0466483	Up
8639	AOC3	0.598613	0.00634332	0.0468329	Up
3032	HADHB	-0.591809	0.00635485	0.0468885	Down
2118	ETV4	0.582435	0.00644459	0.0474451	Up
81614	NIPA2	-0.671773	0.00645768	0.0474682	Down
55032	SLC35A5	0.601687	0.00649456	0.0477094	Up
1629	DBT	-0.607833	0.00651294	0.0477847	Down
6720	SREBF1	-0.58718	0.00655942	0.0480681	Down
84790	TUBA1C	-0.634062	0.00655976	0.0480681	Down
79665	DHX40	0.595117	0.00659227	0.0482461	Up
23632	CA14	-0.597738	0.00667921	0.0488215	Down
3717	JAK2	0.602977	0.00669638	0.0489165	Up
637	BID	-0.589979	0.00677309	0.0493846	Down
4942	OAT	0.592894	0.00679739	0.0495311	Up
864	RUNX3	0.610457	0.00680831	0.0495799	Up
64393	ZMAT3	0.604362	0.00684073	0.049749	Up
4085	MAD2L1	0.621719	0.00684336	0.049749	Up
5066	PAM	0.617696	0.00684565	0.049749	Up
54801	HAUS6	-0.629371	0.00685438	0.049761	Down
2259	FGF14	0.613409	0.00688747	0.0499394	Up

## Sheet: Up
ID	Symbol	Combined.ES	P.Value	FDR	UpDown
3151	HMGN2	2.97328	0	0	Up
4060	LUM	2.86818	0	0	Up
54829	ASPN	2.65145	0	0	Up
57570	TRMT5	2.40991	0	0	Up
5654	HTRA1	2.35449	0	0	Up
25878	MXRA5	2.29392	0	0	Up
392	ARHGAP1	2.03315	1.55431e-15	1.30329e-12	Up
2487	FRZB	1.8101	3.18634e-13	2.07802e-10	Up
51466	EVL	1.84077	3.91687e-13	2.299e-10	Up
4628	MYH10	1.79189	1.08225e-12	5.29353e-10	Up
10947	AP3M2	1.79928	1.27431e-12	5.98367e-10	Up
3910	LAMA4	1.86981	1.44884e-12	6.29924e-10	Up
3043	HBB	1.82337	1.55898e-12	6.536e-10	Up
1513	CTSK	1.71424	4.12714e-12	1.56286e-09	Up
1842	ECM2	1.6876	1.08586e-11	3.86272e-09	Up
4330	MN1	1.66379	1.13491e-11	3.91846e-09	Up
7060	THBS4	1.75312	1.6261e-11	5.45394e-09	Up
23114	NFASC	1.7045	3.06266e-11	9.21861e-09	Up
57758	SCUBE2	1.6008	5.44127e-11	1.55793e-08	Up
4878	NPPA	1.59787	5.95264e-11	1.66376e-08	Up
80760	ITIH5	1.63781	6.97613e-11	1.90448e-08	Up
9865	TRIL	1.59337	8.8439e-11	2.30708e-08	Up
57037	ANKMY2	1.5672	1.87103e-10	4.30668e-08	Up
83468	GLT8D2	1.53156	2.45558e-10	5.14751e-08	Up
23090	ZNF423	1.56531	5.82457e-10	1.15889e-07	Up
79887	PLBD1	1.47905	7.29411e-10	1.4037e-07	Up
79987	SVEP1	1.4947	9.24492e-10	1.69794e-07	Up
51226	COPZ2	1.48543	9.23206e-10	1.69794e-07	Up
3782	KCNN3	1.46759	9.77419e-10	1.75277e-07	Up
4053	LTBP2	1.47219	1.01931e-09	1.75965e-07	Up
1278	COL1A2	1.46031	1.11256e-09	1.89281e-07	Up
26002	MOXD1	1.45394	1.49105e-09	2.3809e-07	Up
4239	MFAP4	1.47605	1.53628e-09	2.40459e-07	Up
283298	OLFML1	1.45782	1.80055e-09	2.70982e-07	Up
7779	SLC30A1	1.47892	2.0056e-09	2.94297e-07	Up
2331	FMOD	1.43875	2.26304e-09	3.23973e-07	Up
2246	FGF1	1.46551	2.76835e-09	3.82325e-07	Up
1307	COL16A1	1.46047	5.91271e-09	7.12632e-07	Up
22864	R3HDM2	1.39428	6.21884e-09	7.37403e-07	Up
6424	SFRP4	1.38044	7.42494e-09	8.62984e-07	Up
56034	PDGFC	1.39582	8.24068e-09	9.39197e-07	Up
79583	TMEM231	1.37745	8.80194e-09	9.74774e-07	Up
3155	HMGCL	1.48456	9.08458e-09	9.96671e-07	Up
4958	OMD	1.3599	1.06951e-08	1.13108e-06	Up
78991	PCYOX1L	1.37471	1.30832e-08	1.34723e-06	Up
7373	COL14A1	1.36185	1.4612e-08	1.49156e-06	Up
56898	BDH2	1.37727	1.50155e-08	1.51349e-06	Up
83700	JAM3	1.34832	1.52135e-08	1.51349e-06	Up
187	APLNR	1.43905	1.61074e-08	1.58895e-06	Up
8722	CTSF	1.35511	1.80061e-08	1.76144e-06	Up
9686	VGLL4	1.33442	1.83976e-08	1.77346e-06	Up
30845	EHD3	1.37586	1.86062e-08	1.77576e-06	Up
10858	CYP46A1	1.35732	1.95497e-08	1.85076e-06	Up
8324	FZD7	1.34142	2.24965e-08	2.07942e-06	Up
5179	PENK	1.34506	2.35965e-08	2.15753e-06	Up
30008	EFEMP2	1.35293	2.8466e-08	2.53615e-06	Up
3790	KCNS3	1.31928	3.36658e-08	2.92743e-06	Up
80310	PDGFD	1.36618	4.02243e-08	3.39707e-06	Up
9910	RABGAP1L	1.39128	4.10094e-08	3.43864e-06	Up
81578	COL21A1	1.33942	4.16628e-08	3.46865e-06	Up
57125	PLXDC1	1.30344	4.40037e-08	3.63774e-06	Up
51196	PLCE1	1.35107	5.04429e-08	4.02822e-06	Up
161291	TMEM30B	1.28913	5.02516e-08	4.02822e-06	Up
1306	COL15A1	1.38304	5.75779e-08	4.53629e-06	Up
333	APLP1	1.3181	5.94561e-08	4.65303e-06	Up
4692	NDN	1.3189	6.1034e-08	4.74489e-06	Up
10234	LRRC17	1.29294	8.41254e-08	6.33044e-06	Up
6649	SOD3	1.26843	8.95806e-08	6.61375e-06	Up
23126	POGZ	1.25171	1.0022e-07	7.30734e-06	Up
23012	STK38L	1.24259	1.18434e-07	8.3753e-06	Up
55008	HERC6	1.30157	1.34935e-07	9.42858e-06	Up
25891	PAMR1	1.3234	1.42967e-07	9.81459e-06	Up
1519	CTSO	1.28885	1.6008e-07	1.08623e-05	Up
2191	FAP	1.24029	1.88091e-07	1.25455e-05	Up
81031	SLC2A10	1.23706	1.90282e-07	1.26199e-05	Up
9737	GPRASP1	1.24895	1.92016e-07	1.26634e-05	Up
55325	UFSP2	1.25874	2.04079e-07	1.33837e-05	Up
2131	EXT1	1.21629	2.37674e-07	1.533e-05	Up
5507	PPP1R3C	1.28149	2.81127e-07	1.74611e-05	Up
6596	HLTF	1.27846	2.88497e-07	1.78246e-05	Up
5786	PTPRA	1.20184	2.9525e-07	1.79583e-05	Up
1277	COL1A1	1.1949	3.10057e-07	1.87617e-05	Up
26577	PCOLCE2	1.1987	3.37668e-07	2.03276e-05	Up
23127	COLGALT2	1.19551	3.56346e-07	2.09819e-05	Up
7508	XPC	1.18618	3.71427e-07	2.16924e-05	Up
10964	IFI44L	1.22545	3.73855e-07	2.17262e-05	Up
7846	TUBA1A	1.19863	4.61267e-07	2.62855e-05	Up
93129	ORAI3	1.19238	5.00768e-07	2.83987e-05	Up
4223	MEOX2	1.18604	5.32609e-07	2.99153e-05	Up
23154	NCDN	1.17574	5.68954e-07	3.18045e-05	Up
2960	GTF2E1	1.21685	5.99065e-07	3.27089e-05	Up
5274	SERPINI1	1.16934	6.06553e-07	3.28126e-05	Up
4675	NAP1L3	1.15847	6.77233e-07	3.56504e-05	Up
1408	CRY2	1.21191	7.55967e-07	3.90938e-05	Up
6586	SLIT3	1.17262	7.83681e-07	4.01731e-05	Up
7058	THBS2	1.153	7.98031e-07	4.07308e-05	Up
55753	OGDHL	1.14668	8.27218e-07	4.20377e-05	Up
23484	LEPROTL1	1.16392	9.15432e-07	4.58405e-05	Up
56944	OLFML3	1.17016	9.30614e-07	4.62901e-05	Up
29087	THYN1	1.22634	1.05243e-06	5.04266e-05	Up
5270	SERPINE2	1.20338	1.04413e-06	5.04266e-05	Up
51474	LIMA1	1.13337	1.25466e-06	5.91503e-05	Up
3148	HMGB2	1.15191	1.26891e-06	5.95829e-05	Up
9805	SCRN1	1.12973	1.31323e-06	6.11746e-05	Up
5999	RGS4	1.16119	1.46618e-06	6.77619e-05	Up
8334	HIST1H2AC	1.12351	1.54187e-06	7.09806e-05	Up
23213	SULF1	1.1067	1.7381e-06	7.87782e-05	Up
22872	SEC31A	1.14286	1.92007e-06	8.63517e-05	Up
79825	EFCC1	1.09576	2.18407e-06	9.71166e-05	Up
55114	ARHGAP17	1.108	2.38478e-06	0.000104352	Up
29969	MDFIC	1.08912	2.39124e-06	0.000104352	Up
65997	RASL11B	1.11501	2.43301e-06	0.000105782	Up
1281	COL3A1	1.08571	2.45676e-06	0.00010642	Up
6387	CXCL12	1.16483	2.50439e-06	0.000107296	Up
3693	ITGB5	1.11541	2.4968e-06	0.000107296	Up
6919	TCEA2	1.08497	2.49855e-06	0.000107296	Up
2149	F2R	1.1048	2.89552e-06	0.000118848	Up
8483	CILP	1.07562	3.00851e-06	0.000122499	Up
399665	FAM102A	1.07061	3.38976e-06	0.00013581	Up
9341	VAMP3	1.09393	4.27212e-06	0.000164575	Up
51031	GLOD4	1.08883	4.42116e-06	0.000169608	Up
8082	SSPN	1.06342	4.54985e-06	0.000173411	Up
50650	ARHGEF3	1.07293	4.60676e-06	0.000173887	Up
2628	GATM	1.13245	4.90165e-06	0.000184425	Up
6892	TAPBP	1.08382	5.08473e-06	0.000190702	Up
201229	LYRM9	1.11839	5.66724e-06	0.000209207	Up
2042	EPHA3	1.03599	6.14286e-06	0.000223394	Up
81621	KAZALD1	1.05742	6.24173e-06	0.000225451	Up
5168	ENPP2	1.06963	6.26861e-06	0.000225728	Up
23265	EXOC7	1.06534	6.29712e-06	0.000226061	Up
3913	LAMB2	1.06562	6.90852e-06	0.000245012	Up
79971	WLS	1.03409	6.93191e-06	0.000245101	Up
8396	PIP4K2B	1.05645	7.21897e-06	0.000252966	Up
1489	CTF1	1.02873	7.4831e-06	0.000261441	Up
22883	CLSTN1	1.03465	7.6771e-06	0.000267423	Up
51780	KDM3B	1.04524	7.91657e-06	0.000274949	Up
25960	GPR124	1.06387	8.06449e-06	0.00027926	Up
6775	STAT4	1.02829	8.1994e-06	0.000283096	Up
79630	C1orf54	1.05396	8.89039e-06	0.000304269	Up
5193	PEX12	1.05698	9.44818e-06	0.000320556	Up
9278	ZBTB22	1.03904	9.53777e-06	0.000322662	Up
4802	NFYC	1.02615	9.61112e-06	0.00032421	Up
5096	PCCB	1.07016	9.85978e-06	0.000330697	Up
5993	RFX5	1.02958	9.97957e-06	0.000332813	Up
29105	C16orf80	1.06472	1.02173e-05	0.000339658	Up
79144	PPDPF	1.01438	1.02904e-05	0.000339658	Up
1428	CRYM	1.03818	1.06166e-05	0.000348124	Up
51510	CHMP5	1.00992	1.15137e-05	0.00037234	Up
5799	PTPRN2	1.02451	1.16227e-05	0.000373897	Up
169611	OLFML2A	1.06639	1.21199e-05	0.000384529	Up
7345	UCHL1	1.01326	1.20967e-05	0.000384529	Up
3075	CFH	0.997626	1.26717e-05	0.000395929	Up
8434	RECK	1.01096	1.31789e-05	0.000409278	Up
5325	PLAGL1	0.993862	1.49813e-05	0.000456793	Up
223	ALDH9A1	1.01344	1.5083e-05	0.000458702	Up
2053	EPHX2	1.0396	1.548e-05	0.000467146	Up
9846	GAB2	0.989743	1.56338e-05	0.000469374	Up
7447	VSNL1	0.985841	1.57346e-05	0.000471196	Up
10956	OS9	0.996909	1.58975e-05	0.000473657	Up
79605	PGBD5	0.982457	1.70689e-05	0.000499681	Up
23179	RGL1	1.01414	1.76244e-05	0.000514658	Up
901	CCNG2	1.03351	1.87261e-05	0.000542779	Up
10681	GNB5	1.01286	1.89994e-05	0.000549346	Up
22822	PHLDA1	0.98056	2.00326e-05	0.000574969	Up
64288	ZSCAN31	0.990178	2.03449e-05	0.000579682	Up
8321	FZD1	0.987208	2.20439e-05	0.000623549	Up
63917	GALNT11	1.02059	2.24879e-05	0.000633059	Up
6567	SLC16A2	1.01023	2.2597e-05	0.000634608	Up
79717	PPCS	0.965378	2.33129e-05	0.000648508	Up
1742	DLG4	1.00422	2.39743e-05	0.000663761	Up
51321	AMZ2	0.982899	2.40843e-05	0.000665236	Up
9823	ARMCX2	0.966276	2.47378e-05	0.000680087	Up
23150	FRMD4B	1.00496	2.69608e-05	0.000729247	Up
23424	TDRD7	0.957648	2.68794e-05	0.000729247	Up
8910	SGCE	0.964238	2.74261e-05	0.000738429	Up
60492	CCDC90B	0.962571	2.79598e-05	0.000745956	Up
3437	IFIT3	0.987061	2.88838e-05	0.000765389	Up
113791	PIK3IP1	0.956339	3.11766e-05	0.000813293	Up
26509	MYOF	1.02313	3.16616e-05	0.000824115	Up
5740	PTGIS	0.953376	3.42495e-05	0.000878311	Up
64112	MOAP1	0.971778	3.45253e-05	0.000881071	Up
56967	C14orf132	0.948249	3.44862e-05	0.000881071	Up
4907	NT5E	0.947353	3.53314e-05	0.000898079	Up
79365	BHLHE41	0.940634	3.61844e-05	0.000912679	Up
9812	KIAA0141	0.977198	3.67287e-05	0.000919781	Up
1363	CPE	0.958033	3.69336e-05	0.000922476	Up
3797	KIF3C	0.943453	3.92492e-05	0.000963337	Up
633	BGN	0.933026	3.95805e-05	0.00096799	Up
1123	CHN1	0.944675	4.02618e-05	0.000980568	Up
5998	RGS3	0.928359	4.09131e-05	0.000992312	Up
8431	NR0B2	0.993929	4.26107e-05	0.00102292	Up
25776	CBY1	0.954063	4.27581e-05	0.00102436	Up
54453	RIN2	0.966914	4.31228e-05	0.00103099	Up
55737	VPS35	0.980971	4.397e-05	0.00104699	Up
11015	KDELR3	0.931115	4.41381e-05	0.00104886	Up
10916	MAGED2	0.953234	4.48453e-05	0.00106351	Up
6622	SNCA	0.924445	4.5392e-05	0.00107431	Up
10346	TRIM22	0.987869	4.72868e-05	0.00111242	Up
9240	PNMA1	0.92447	4.81445e-05	0.00112583	Up
23326	USP22	0.933498	5.00401e-05	0.00116321	Up
51374	ATRAID	1.02701	5.14051e-05	0.00118474	Up
9734	HDAC9	0.936021	5.12745e-05	0.00118474	Up
6320	CLEC11A	0.912799	5.32724e-05	0.00122142	Up
3275	PRMT2	0.921548	5.46556e-05	0.00125069	Up
334	APLP2	0.96917	5.73272e-05	0.00128674	Up
6352	CCL5	0.952138	5.66755e-05	0.00128674	Up
4883	NPR3	0.941079	5.72199e-05	0.00128674	Up
55329	MNS1	0.912077	5.70399e-05	0.00128674	Up
2192	FBLN1	0.936859	5.76224e-05	0.0012909	Up
54470	ARMCX6	0.948466	5.98141e-05	0.00133237	Up
6709	SPTAN1	0.934696	6.08427e-05	0.00135271	Up
3306	HSPA2	0.917388	6.248e-05	0.00138127	Up
23564	DDAH2	0.92817	6.2925e-05	0.00138849	Up
55629	PNRC2	0.907121	6.35549e-05	0.00138933	Up
64102	TNMD	0.925258	6.40969e-05	0.00139858	Up
1311	COMP	0.901939	6.75907e-05	0.00145587	Up
51626	DYNC2LI1	0.936618	7.26482e-05	0.00154776	Up
5379	PMS2P1	0.927106	7.33708e-05	0.0015575	Up
63932	CXorf56	0.910168	7.55741e-05	0.0015899	Up
10983	CCNI	0.896822	7.72333e-05	0.00161324	Up
9149	DYRK1B	0.894143	7.94241e-05	0.00164728	Up
1793	DOCK1	0.934386	8.32021e-05	0.00170455	Up
57020	C16orf62	0.927079	9.35342e-05	0.00187268	Up
57088	PLSCR4	0.912692	9.40063e-05	0.00187677	Up
7070	THY1	0.878091	9.67976e-05	0.00191944	Up
283232	TMEM80	0.91367	9.7445e-05	0.00192577	Up
2026	ENO2	0.890296	9.98928e-05	0.00196752	Up
63894	VIPAS39	0.892901	0.00010272	0.00201952	Up
4599	MX1	0.917166	0.000105262	0.00204907	Up
9890	LPPR4	0.87945	0.000107655	0.00208886	Up
11142	PKIG	0.922197	0.000116987	0.00225132	Up
284119	PTRF	0.898623	0.000119072	0.0022877	Up
5157	PDGFRL	0.901155	0.000120081	0.00229758	Up
10966	RAB40B	0.901898	0.000125127	0.00237682	Up
23595	ORC3	0.914046	0.000127927	0.00241826	Up
55281	TMEM140	0.857347	0.000132109	0.00249328	Up
4666	NACA	0.854556	0.000143385	0.00265908	Up
26751	SH3YL1	0.868757	0.000143614	0.00265913	Up
51191	HERC5	0.858291	0.000145403	0.00268379	Up
165	AEBP1	0.857165	0.000147516	0.00271425	Up
23211	ZC3H4	0.876618	0.000149555	0.00274747	Up
4016	LOXL1	0.8902	0.000151971	0.00278749	Up
84302	TMEM246	0.869766	0.000161214	0.00292503	Up
1404	HAPLN1	0.870431	0.000162749	0.00294378	Up
6780	STAU1	0.872654	0.00016651	0.00299795	Up
51507	RTFDC1	0.87003	0.000169985	0.0030465	Up
25875	LETMD1	0.853081	0.000171491	0.00306722	Up
4281	MID1	0.944532	0.000178164	0.00313731	Up
90865	IL33	0.856131	0.000184121	0.00323563	Up
90362	FAM110B	0.848147	0.000187399	0.0032883	Up
64708	COPS7B	0.843982	0.000190597	0.00333445	Up
8842	PROM1	0.846976	0.000192431	0.00335654	Up
55786	ZNF415	0.845573	0.000207045	0.00355337	Up
6529	SLC6A1	0.847974	0.000208742	0.00357727	Up
10536	LEPREL2	0.826855	0.000210078	0.0035949	Up
56920	SEMA3G	0.833827	0.000212652	0.00361273	Up
7726	TRIM26	0.826786	0.000217318	0.00367594	Up
6403	SELP	0.846175	0.000221329	0.00372766	Up
734	OSGIN2	0.869962	0.000226417	0.0037808	Up
23248	RPRD2	0.890872	0.000228597	0.00381179	Up
9627	SNCAIP	0.859295	0.000229328	0.00381314	Up
54951	COMMD8	0.834454	0.000229318	0.00381314	Up
57493	HEG1	0.879876	0.000232305	0.00385174	Up
1643	DDB2	0.859167	0.000233381	0.00386412	Up
9638	FEZ1	0.917429	0.000236694	0.00390246	Up
55689	YEATS2	0.860997	0.000239968	0.00394535	Up
81558	FAM117A	0.895413	0.000245115	0.00401872	Up
11160	ERLIN2	0.855376	0.000246569	0.00403693	Up
5764	PTN	0.819603	0.000249519	0.00407385	Up
6840	SVIL	0.847574	0.000250522	0.00408456	Up
79042	TSEN34	0.846055	0.000255233	0.00413837	Up
729515	TMEM242	0.843438	0.000258323	0.00418269	Up
79868	ALG13	0.815183	0.000259104	0.00418957	Up
58529	MYOZ1	0.877722	0.000261948	0.00422392	Up
8019	BRD3	0.823367	0.000264988	0.00426708	Up
5223	PGAM1	0.82463	0.000278726	0.00445165	Up
8125	ANP32A	0.828055	0.000291311	0.00462817	Up
79933	SYNPO2L	0.837897	0.000298443	0.00471523	Up
51367	POP5	0.830641	0.000305419	0.00480605	Up
64927	TTC23	0.829837	0.000306345	0.00481416	Up
9358	ITGBL1	0.804769	0.000306884	0.00481619	Up
1523	CUX1	0.82554	0.00031023	0.0048622	Up
4311	MME	0.815147	0.000314508	0.00491612	Up
2530	FUT8	0.827576	0.000315075	0.00491844	Up
2896	GRN	0.832973	0.000323522	0.00502674	Up
10657	KHDRBS1	0.820258	0.000325377	0.00503905	Up
80762	NDFIP1	0.837356	0.000332087	0.00511598	Up
284325	C19orf54	0.860952	0.00033404	0.00513931	Up
55107	ANO1	0.79638	0.000353592	0.00540471	Up
55612	FERMT1	0.810854	0.000371309	0.0056388	Up
9658	ZNF516	0.836348	0.000371829	0.00563941	Up
5612	PRKRIR	0.827657	0.000384978	0.00582379	Up
2099	ESR1	0.868581	0.000395423	0.0059435	Up
439921	MXRA7	0.798025	0.000397945	0.00597376	Up
58473	PLEKHB1	0.788738	0.000408293	0.00612126	Up
10671	DCTN6	0.797977	0.000411551	0.00614656	Up
83714	NRIP2	0.78239	0.000421615	0.00628088	Up
1959	EGR2	0.788909	0.000428112	0.00636152	Up
26011	TENM4	0.849851	0.000434275	0.00644495	Up
8864	PER2	0.797431	0.000451203	0.00664577	Up
10631	POSTN	0.804619	0.000454212	0.00667333	Up
64766	S100PBP	0.837464	0.000461669	0.00677442	Up
4603	MYBL1	0.832102	0.000465592	0.00681495	Up
78986	DUSP26	0.781832	0.000470474	0.00686927	Up
29937	NENF	0.779853	0.000488004	0.00706372	Up
55353	LAPTM4B	0.823829	0.000491803	0.00709499	Up
84168	ANTXR1	0.771579	0.000492582	0.00709499	Up
7314	UBB	0.785776	0.000502472	0.00721972	Up
9308	CD83	0.788422	0.00051173	0.00731693	Up
57523	NYNRIN	0.821858	0.000518736	0.00739009	Up
93210	PGAP3	0.789608	0.000523754	0.00744546	Up
55277	FGGY	0.814117	0.000525694	0.00746206	Up
1393	CRHBP	0.778783	0.000526614	0.00746609	Up
64081	PBLD	0.81267	0.000527861	0.00747473	Up
3660	IRF2	0.783153	0.000535724	0.00756072	Up
2662	GDF10	0.773625	0.000535865	0.00756072	Up
83439	TCF7L1	0.814459	0.000541842	0.00762671	Up
8623	ASMTL	0.849285	0.00056178	0.00784155	Up
2802	GOLGA3	0.794499	0.000561205	0.00784155	Up
818	CAMK2G	0.821573	0.000583135	0.00811958	Up
9230	RAB11B	0.779282	0.000589557	0.00816134	Up
26037	SIPA1L1	0.775645	0.000588972	0.00816134	Up
2983	GUCY1B3	0.845455	0.000591571	0.00816994	Up
1289	COL5A1	0.762745	0.000597357	0.00822884	Up
29994	BAZ2B	0.819807	0.000602926	0.00827807	Up
6817	SULT1A1	0.805229	0.000610888	0.00833862	Up
1909	EDNRA	0.77828	0.000610789	0.00833862	Up
10384	BTN3A3	0.844335	0.000617921	0.00839639	Up
23102	TBC1D2B	0.766355	0.000617981	0.00839639	Up
4953	ODC1	0.759705	0.000636735	0.00858166	Up
79154	DHRS11	0.761003	0.000644583	0.00864773	Up
6445	SGCG	0.783853	0.000650857	0.00871198	Up
2949	GSTM5	0.766823	0.000653051	0.0087314	Up
307	ANXA4	0.756816	0.000653892	0.00873269	Up
55823	VPS11	0.786862	0.000657016	0.00874613	Up
9547	CXCL14	0.800535	0.000658057	0.00874851	Up
3687	ITGAX	0.81953	0.000675348	0.00890598	Up
55384	MEG3	0.812316	0.000676904	0.00890598	Up
1196	CLK2	0.76609	0.000682997	0.00894833	Up
6624	FSCN1	0.761067	0.00071146	0.00923875	Up
1070	CETN3	0.783867	0.000714338	0.00926587	Up
54796	BNC2	0.775374	0.000715571	0.00927162	Up
11092	C9orf9	0.778514	0.000718399	0.009298	Up
5430	POLR2A	0.75465	0.000723662	0.00934551	Up
1153	CIRBP	0.770338	0.000729038	0.00939427	Up
219699	UNC5B	0.757744	0.000768067	0.00982172	Up
51339	DACT1	0.741204	0.000771213	0.00985122	Up
5538	PPT1	0.772581	0.000772262	0.00985143	Up
7045	TGFBI	0.755712	0.000787306	0.00999155	Up
55133	SRBD1	0.809965	0.000803697	0.0101666	Up
54856	GON4L	0.767486	0.000816387	0.010316	Up
7059	THBS3	0.742848	0.000851581	0.0106575	Up
23220	DTX4	0.7516	0.00086085	0.010731	Up
57198	ATP8B2	0.741835	0.00086022	0.010731	Up
7561	ZNF14	0.740623	0.000870371	0.0108119	Up
2202	EFEMP1	0.740788	0.000880442	0.010891	Up
55070	DET1	0.779488	0.00088587	0.0109466	Up
25839	COG4	0.763484	0.000894598	0.0110111	Up
29906	ST8SIA5	0.755545	0.000915925	0.0112234	Up
6659	SOX4	0.74613	0.000930342	0.0113647	Up
83451	ABHD11	0.743427	0.00093036	0.0113647	Up
27141	CIDEB	0.771191	0.000941987	0.0114598	Up
3149	HMGB3	0.770207	0.00094205	0.0114598	Up
22795	NID2	0.806039	0.000950547	0.0115389	Up
103	ADAR	0.77134	0.00096576	0.0116877	Up
654	BMP6	0.736927	0.000998687	0.0119996	Up
2534	FYN	0.758847	0.00108589	0.0128631	Up
28954	REM1	0.741263	0.00109114	0.0128992	Up
51109	RDH11	0.720204	0.00109975	0.0129748	Up
27043	PELP1	0.727014	0.00111066	0.0130773	Up
9254	CACNA2D2	0.782584	0.00113621	0.0132989	Up
9885	OSBPL2	0.76724	0.00115159	0.0134112	Up
6678	SPARC	0.741246	0.00115961	0.013468	Up
57599	WDR48	0.729277	0.00116232	0.013468	Up
2670	GFAP	0.7402	0.00116967	0.013488	Up
5607	MAP2K5	0.738439	0.00116867	0.013488	Up
4676	NAP1L4	0.714144	0.00116891	0.013488	Up
4642	MYO1D	0.711276	0.0011853	0.013628	Up
3150	HMGN1	0.716467	0.00121058	0.0138509	Up
390616	ANKRD34C	0.743484	0.00121264	0.013861	Up
115817	DHRS1	0.738073	0.0012202	0.0139202	Up
5125	PCSK5	0.71939	0.00122892	0.013979	Up
55837	EAPP	0.733749	0.00123766	0.0140648	Up
9580	SOX13	0.774512	0.00124246	0.014092	Up
388969	C2orf68	0.770841	0.0012572	0.0142317	Up
25797	QPCT	0.711558	0.00127143	0.0143375	Up
1290	COL5A2	0.722782	0.00127357	0.0143479	Up
1120	CHKB	0.781621	0.00127746	0.0143778	Up
27306	HPGDS	0.799194	0.0012791	0.0143825	Up
3251	HPRT1	0.70875	0.00129155	0.0144948	Up
5287	PIK3C2B	0.731108	0.00132011	0.0147588	Up
4157	MC1R	0.732023	0.00134636	0.0149243	Up
10763	NES	0.701144	0.0013961	0.0153598	Up
26152	ZNF337	0.729013	0.00141471	0.0155208	Up
9905	SGSM2	0.723701	0.00141805	0.0155429	Up
1958	EGR1	0.745697	0.00143232	0.0156409	Up
819	CAMLG	0.717074	0.00143025	0.0156409	Up
55769	ZNF83	0.69933	0.00143199	0.0156409	Up
26576	SRPK3	0.751324	0.00144948	0.015755	Up
9902	MRC2	0.70969	0.00145164	0.015764	Up
23259	DDHD2	0.775107	0.00146547	0.0158847	Up
1027	CDKN1B	0.721586	0.0014728	0.0159347	Up
3073	HEXA	0.722745	0.00150163	0.0162144	Up
10653	SPINT2	0.715257	0.00151921	0.0163465	Up
1573	CYP2J2	0.725709	0.00152146	0.0163557	Up
22874	PLEKHA6	0.732254	0.0015329	0.0164486	Up
2627	GATA6	0.699268	0.00154148	0.0165104	Up
25903	OLFML2B	0.697416	0.00154502	0.0165333	Up
4752	NEK3	0.704989	0.0015516	0.0165886	Up
1058	CENPA	0.722221	0.00155452	0.0165895	Up
5049	PAFAH1B2	0.724719	0.00157434	0.0167402	Up
10266	RAMP2	0.732655	0.0015924	0.0168741	Up
5547	PRCP	0.700518	0.00159269	0.0168741	Up
84193	SETD3	0.734038	0.00162327	0.0171343	Up
5358	PLS3	0.723677	0.00165454	0.0174177	Up
3426	CFI	0.703131	0.00166451	0.0174784	Up
7424	VEGFC	0.711754	0.0016695	0.0175031	Up
2195	FAT1	0.730635	0.00169095	0.0176759	Up
26145	IRF2BP1	0.724919	0.00171398	0.0178689	Up
9973	CCS	0.72721	0.00176885	0.0183109	Up
11215	AKAP11	0.739292	0.0018352	0.0188977	Up
55120	FANCL	0.703928	0.00184529	0.0189467	Up
29799	YPEL1	0.694028	0.0018435	0.0189467	Up
6548	SLC9A1	0.839249	0.00186323	0.019036	Up
7033	TFF3	0.683709	0.00191113	0.0194073	Up
273	AMPH	0.742723	0.00191593	0.0194392	Up
10026	PIGK	0.746343	0.00192892	0.0195001	Up
81533	ITFG1	0.732012	0.00193356	0.0195001	Up
25827	FBXL2	0.703749	0.00193932	0.0195191	Up
9246	UBE2L6	0.697865	0.00194043	0.0195191	Up
54386	TERF2IP	0.732428	0.00194613	0.0195435	Up
7170	TPM3	0.683828	0.00194619	0.0195435	Up
22891	ZNF365	0.671943	0.00201003	0.0200473	Up
4130	MAP1A	0.684761	0.00203791	0.0202722	Up
3357	HTR2B	0.701377	0.00207221	0.0205453	Up
8786	RGS11	0.692273	0.00207633	0.0205688	Up
7108	TM7SF2	0.720017	0.00208219	0.0205921	Up
3550	IK	0.693192	0.00208986	0.0206505	Up
63941	NECAB3	0.700128	0.00210496	0.0207823	Up
4681	NBL1	0.685584	0.00213068	0.0209832	Up
23608	MKRN1	0.727756	0.00214602	0.0210813	Up
5436	POLR2G	0.684099	0.00215575	0.0211414	Up
11341	SCRG1	0.683947	0.00215505	0.0211414	Up
3741	KCNA5	0.741785	0.00216532	0.0212148	Up
2159	F10	0.68727	0.00217784	0.0212732	Up
11143	KAT7	0.686056	0.00220114	0.0214789	Up
57134	MAN1C1	0.742974	0.00221252	0.0215541	Up
1178	CLC	0.755326	0.00227117	0.0219615	Up
51617	HMP19	0.703412	0.00229487	0.0221542	Up
1583	CYP11A1	0.676468	0.00232454	0.0224037	Up
847	CAT	0.717096	0.00236049	0.0226744	Up
23240	KIAA0922	0.721238	0.00240359	0.0229766	Up
7091	TLE4	0.658417	0.00240551	0.0229766	Up
1356	CP	0.676214	0.00247177	0.023488	Up
23098	SARM1	0.655356	0.00248937	0.0236039	Up
310	ANXA7	0.654854	0.00249965	0.0236641	Up
11248	NXPH3	0.72183	0.00250406	0.0236867	Up
54681	P4HTM	0.679727	0.00254949	0.0240074	Up
1805	DPT	0.668563	0.00258581	0.0242645	Up
23066	CAND2	0.714808	0.00260222	0.0243794	Up
9881	TRANK1	0.660483	0.00260196	0.0243794	Up
100130958	SYCE1L	0.708586	0.00264104	0.0246644	Up
7188	TRAF5	0.708461	0.00269146	0.0249961	Up
5311	PKD2	0.652673	0.00276041	0.0255354	Up
5532	PPP3CB	0.695476	0.00279926	0.0258134	Up
27295	PDLIM3	0.650149	0.00282791	0.025996	Up
1809	DPYSL3	0.652413	0.00283324	0.0260245	Up
3479	IGF1	0.667161	0.00283706	0.0260393	Up
285282	RABL3	0.690634	0.00292534	0.0266826	Up
1069	CETN2	0.675201	0.00296626	0.026993	Up
5378	PMS1	0.710068	0.00297984	0.0270955	Up
3490	IGFBP7	0.67267	0.00310028	0.027931	Up
56906	THAP10	0.655864	0.00322926	0.0288913	Up
1649	DDIT3	0.651606	0.00323147	0.0288913	Up
5300	PIN1	0.689486	0.00324801	0.0289949	Up
79582	SPAG16	0.671622	0.00331133	0.0294259	Up
79683	ZDHHC14	0.640827	0.00331781	0.0294457	Up
11345	GABARAPL2	0.638442	0.00331857	0.0294457	Up
25847	ANAPC13	0.670287	0.00332494	0.0294577	Up
25814	ATXN10	0.6781	0.00333432	0.0295118	Up
2222	FDFT1	0.666203	0.00333607	0.0295118	Up
9719	ADAMTSL2	0.640751	0.00334097	0.0295329	Up
23438	HARS2	0.646068	0.00336713	0.0297194	Up
80127	CCDC176	0.667533	0.00337824	0.0297743	Up
1107	CHD3	0.67593	0.00341579	0.0300359	Up
50507	NOX4	0.630524	0.00344192	0.0301753	Up
686	BTD	0.654995	0.00346434	0.0303039	Up
5051	PAFAH2	0.642964	0.00347141	0.0303431	Up
9839	ZEB2	0.675994	0.00350644	0.030581	Up
8295	TRRAP	0.674016	0.00351649	0.0306459	Up
7988	ZNF212	0.629201	0.00366612	0.0316446	Up
79673	ZNF329	0.665912	0.0037399	0.0321542	Up
26504	CNNM4	0.654871	0.00377338	0.0322677	Up
6500	SKP1	0.63655	0.00376887	0.0322677	Up
51435	SCARA3	0.633924	0.00377404	0.0322677	Up
2690	GHR	0.678739	0.00382191	0.0325584	Up
8292	COLQ	0.649742	0.00388776	0.0329995	Up
5073	PARN	0.634642	0.00391146	0.033105	Up
1687	DFNA5	0.626589	0.00390889	0.033105	Up
2826	CCR10	0.649566	0.00393624	0.0332668	Up
1778	DYNC1H1	0.683179	0.00402222	0.0337745	Up
80169	CTC1	0.660448	0.00409401	0.0341857	Up
11253	MAN1B1	0.649577	0.00409901	0.0341857	Up
4358	MPV17	0.6181	0.00415324	0.0345535	Up
7220	TRPC1	0.67806	0.00418982	0.0348331	Up
6045	RNF2	0.65836	0.0042011	0.0348994	Up
9122	SLC16A4	0.654037	0.00423856	0.0350892	Up
26523	AGO1	0.68759	0.00426107	0.0352259	Up
25941	TPGS2	0.643367	0.00428767	0.0353501	Up
10867	TSPAN9	0.627698	0.00429951	0.0353941	Up
2205	FCER1A	0.680156	0.00438314	0.0359816	Up
5919	RARRES2	0.660976	0.00439871	0.0360842	Up
54830	NUP62CL	0.630825	0.00441719	0.0362105	Up
8218	CLTCL1	0.627054	0.00443523	0.0363077	Up
23508	TTC9	0.648258	0.00447864	0.0366374	Up
28986	MAGEH1	0.618132	0.004485	0.0366639	Up
22846	VASH1	0.625618	0.00449665	0.0366826	Up
55601	DDX60	0.624418	0.00449169	0.0366826	Up
122616	C14orf79	0.617288	0.00453085	0.0369131	Up
91543	RSAD2	0.652379	0.0045495	0.0370108	Up
140460	ASB7	0.665332	0.00457368	0.037079	Up
55214	LEPREL1	0.61072	0.00459699	0.0372423	Up
1382	CRABP2	0.60677	0.00469301	0.0378114	Up
4653	MYOC	0.62946	0.00473261	0.0379794	Up
79785	RERGL	0.631902	0.00475242	0.038081	Up
10298	PAK4	0.632792	0.00476346	0.0381434	Up
9379	NRXN2	0.610742	0.00478078	0.0382299	Up
8731	RNMT	0.617622	0.00482339	0.038492	Up
51101	ZC2HC1A	0.620989	0.00488692	0.0388143	Up
670	BPHL	0.634737	0.00495506	0.0392724	Up
64755	C16orf58	0.602519	0.00495798	0.0392724	Up
51409	HEMK1	0.603341	0.00496659	0.0393141	Up
4092	SMAD7	0.623601	0.00497464	0.0393513	Up
10404	CPQ	0.640614	0.00499043	0.0394496	Up
1462	VCAN	0.618604	0.00503461	0.0397638	Up
54960	GEMIN8	0.608527	0.00503696	0.0397638	Up
55203	LGI2	0.644095	0.0051167	0.040231	Up
9630	GNA14	0.620226	0.00514577	0.0403548	Up
23355	VPS8	0.627592	0.00519315	0.0405874	Up
79891	ZNF671	0.638536	0.00537378	0.041584	Up
1296	COL8A2	0.622643	0.00537233	0.041584	Up
60489	APOBEC3G	0.622499	0.00539612	0.0417018	Up
7410	VAV2	0.616569	0.00541618	0.0418018	Up
2073	ERCC5	0.612751	0.0054628	0.0419959	Up
4054	LTBP3	0.615013	0.00550204	0.0421681	Up
834	CASP1	0.630061	0.00552329	0.0422948	Up
27123	DKK2	0.622404	0.00566601	0.0431344	Up
11322	TMC6	0.666638	0.00567486	0.0431738	Up
6938	TCF12	0.623127	0.00575148	0.0436587	Up
8448	DOC2A	0.639318	0.00576127	0.0436896	Up
6447	SCG5	0.624149	0.0057806	0.0438079	Up
10645	CAMKK2	0.630756	0.00578818	0.0438088	Up
51309	ARMCX1	0.634949	0.00580937	0.0439408	Up
1593	CYP27A1	0.609383	0.00584619	0.0441624	Up
26053	AUTS2	0.651171	0.00587285	0.0442783	Up
5372	PMM1	0.6062	0.00594771	0.0446135	Up
51066	SSUH2	0.613234	0.00598823	0.0448601	Up
81556	VWA9	0.593401	0.00602595	0.0450565	Up
6376	CX3CL1	0.635447	0.00611699	0.04565	Up
1300	COL10A1	0.621182	0.0061288	0.04568	Up
761	CA3	0.639337	0.00613848	0.0457231	Up
63897	HEATR6	0.607648	0.00619355	0.0460748	Up
23303	KIF13B	0.605921	0.00622097	0.0462495	Up
54149	C21orf91	0.592652	0.00624141	0.0463186	Up
1295	COL8A1	0.627504	0.00630221	0.04662	Up
10561	IFI44	0.613866	0.00630257	0.04662	Up
79096	C11orf49	0.590298	0.00631435	0.0466483	Up
8639	AOC3	0.598613	0.00634332	0.0468329	Up
2118	ETV4	0.582435	0.00644459	0.0474451	Up
55032	SLC35A5	0.601687	0.00649456	0.0477094	Up
79665	DHX40	0.595117	0.00659227	0.0482461	Up
3717	JAK2	0.602977	0.00669638	0.0489165	Up
4942	OAT	0.592894	0.00679739	0.0495311	Up
864	RUNX3	0.610457	0.00680831	0.0495799	Up
4085	MAD2L1	0.621719	0.00684336	0.049749	Up
5066	PAM	0.617696	0.00684565	0.049749	Up
64393	ZMAT3	0.604362	0.00684073	0.049749	Up
2259	FGF14	0.613409	0.00688747	0.0499394	Up

## Sheet: Down 
ID	Symbol	Combined.ES	P.Value	FDR	UpDown
8547	FCN3	-2.79192	0	0	Down
3163	HMOX2	-2.76632	0	0	Down
12	SERPINA3	-2.63144	0	0	Down
28231	SLCO4A1	-2.52769	0	0	Down
4140	MARK3	-2.33951	0	0	Down
2289	FKBP5	-2.07987	4.44089e-16	4.01013e-13	Down
84525	HOPX	-1.95509	1.40332e-13	9.69035e-11	Down
2752	GLUL	-1.85398	3.79252e-13	2.299e-10	Down
476	ATP1A1	-1.83379	4.67182e-13	2.44565e-10	Down
262	AMD1	-1.82825	4.49862e-13	2.44565e-10	Down
10157	AASS	-1.75903	1.42153e-12	6.29924e-10	Down
27254	CSDC2	-1.70918	3.50608e-12	1.41924e-09	Down
4624	MYH6	-1.79853	4.11293e-12	1.56286e-09	Down
23022	PALLD	-1.7121	6.10179e-12	2.2384e-09	Down
9057	SLC7A6	-1.63548	2.04934e-11	6.68255e-09	Down
9588	PRDX6	-1.65662	2.30989e-11	7.32858e-09	Down
598	BCL2L1	-1.62205	2.91465e-11	9.00396e-09	Down
5533	PPP3CC	-1.61759	3.49913e-11	1.02691e-08	Down
5604	MAP2K1	-1.65453	7.18436e-11	1.91676e-08	Down
23212	RRS1	-1.6401	1.44176e-10	3.526e-08	Down
8668	EIF3I	-1.57269	1.6243e-10	3.89136e-08	Down
123	PLIN2	-1.68169	1.84297e-10	4.30668e-08	Down
10212	DDX39A	-1.56592	2.01137e-10	4.54068e-08	Down
7079	TIMP4	-1.53535	2.15822e-10	4.78026e-08	Down
1580	CYP4B1	-1.53414	2.22785e-10	4.84311e-08	Down
26528	DAZAP1	-1.54858	3.5273e-10	7.26438e-08	Down
604	BCL6	-1.52937	4.18812e-10	8.47662e-08	Down
7052	TGM2	-1.55959	7.05165e-10	1.37966e-07	Down
6628	SNRPB	-1.55801	9.8677e-10	1.75277e-07	Down
10527	IPO7	-1.48453	1.00039e-09	1.75277e-07	Down
3995	FADS3	-1.5186	1.23173e-09	2.06561e-07	Down
4501	MT1X	-1.47575	1.27994e-09	2.11622e-07	Down
64771	C6orf106	-1.44924	1.50087e-09	2.3809e-07	Down
5817	PVR	-1.46	1.64195e-09	2.53616e-07	Down
5116	PCNT	-1.5574	1.67007e-09	2.5461e-07	Down
9674	KIAA0040	-1.43601	2.00265e-09	2.94297e-07	Down
26287	ANKRD2	-1.44927	2.22193e-09	3.22015e-07	Down
9064	MAP3K6	-1.45312	2.74399e-09	3.82325e-07	Down
6507	SLC1A3	-1.41554	3.15669e-09	4.25935e-07	Down
10383	TUBB4B	-1.41587	3.72652e-09	4.91524e-07	Down
28232	SLCO3A1	-1.4233	3.98457e-09	5.19721e-07	Down
641	BLM	-1.46122	4.11186e-09	5.3043e-07	Down
9332	CD163	-1.4294	4.33432e-09	5.5305e-07	Down
2878	GPX3	-1.47927	5.7647e-09	7.04914e-07	Down
23026	MYO16	-1.38662	7.17264e-09	8.41996e-07	Down
64061	TSPYL2	-1.43536	8.66724e-09	9.68998e-07	Down
51491	NOP16	-1.43986	9.54056e-09	1.02749e-06	Down
7078	TIMP3	-1.41303	9.64378e-09	1.02917e-06	Down
6584	SLC22A5	-1.46968	1.11019e-08	1.16362e-06	Down
54583	EGLN1	-1.38383	1.51669e-08	1.51349e-06	Down
1978	EIF4EBP1	-1.34278	1.84311e-08	1.77346e-06	Down
10894	LYVE1	-1.38483	1.97815e-08	1.85772e-06	Down
8073	PTP4A2	-1.40338	2.37091e-08	2.15753e-06	Down
54407	SLC38A2	-1.38186	2.59019e-08	2.33894e-06	Down
29995	LMCD1	-1.41541	2.85179e-08	2.53615e-06	Down
23787	MTCH1	-1.33861	2.97128e-08	2.62255e-06	Down
56288	PARD3	-1.36871	3.80724e-08	3.26228e-06	Down
966	CD59	-1.29685	4.7467e-08	3.84286e-06	Down
80273	GRPEL1	-1.28617	5.64084e-08	4.47418e-06	Down
10135	NAMPT	-1.29862	6.40234e-08	4.94455e-06	Down
3678	ITGA5	-1.3323	6.86312e-08	5.26576e-06	Down
221395	GPR116	-1.38949	8.11781e-08	6.18798e-06	Down
4499	MT1M	-1.29221	8.56137e-08	6.36088e-06	Down
9258	MFHAS1	-1.29256	9.91895e-08	7.27741e-06	Down
7049	TGFBR3	-1.2557	1.02781e-07	7.44784e-06	Down
81631	MAP1LC3B	-1.3371	1.03921e-07	7.48425e-06	Down
58526	MID1IP1	-1.24775	1.07368e-07	7.68534e-06	Down
191	AHCY	-1.26441	1.10704e-07	7.87611e-06	Down
2828	GPR4	-1.26475	1.39386e-07	9.68195e-06	Down
5320	PLA2G2A	-1.2698	1.41391e-07	9.76348e-06	Down
2288	FKBP4	-1.33573	1.52267e-07	1.03922e-05	Down
3898	LAD1	-1.30669	1.67167e-07	1.1278e-05	Down
5918	RARRES1	-1.24195	1.82901e-07	1.2269e-05	Down
25777	SUN2	-1.25159	2.15461e-07	1.40517e-05	Down
488	ATP2A2	-1.21043	2.21966e-07	1.43959e-05	Down
1910	EDNRB	-1.21648	2.48006e-07	1.567e-05	Down
7453	WARS	-1.19955	2.80044e-07	1.74611e-05	Down
8660	IRS2	-1.31158	2.91836e-07	1.79364e-05	Down
23516	SLC39A14	-1.21883	2.95069e-07	1.79583e-05	Down
51177	PLEKHO1	-1.30043	3.57473e-07	2.09819e-05	Down
7518	XRCC4	-1.27855	3.56338e-07	2.09819e-05	Down
3716	JAK1	-1.18787	3.55198e-07	2.09819e-05	Down
900	CCNG1	-1.22272	4.18296e-07	2.40705e-05	Down
8459	TPST2	-1.18178	4.5772e-07	2.62106e-05	Down
316	AOX1	-1.19307	5.29173e-07	2.98652e-05	Down
56983	POGLUT1	-1.26612	5.77996e-07	3.21569e-05	Down
51002	TPRKB	-1.16465	5.9319e-07	3.25395e-05	Down
79611	ACSS3	-1.18494	6.04152e-07	3.28126e-05	Down
65983	GRAMD3	-1.17929	6.20972e-07	3.34385e-05	Down
10807	SDCCAG3	-1.17978	6.35353e-07	3.40566e-05	Down
6774	STAT3	-1.23205	6.41236e-07	3.42158e-05	Down
6217	RPS16	-1.15349	6.92521e-07	3.62924e-05	Down
10324	KLHL41	-1.15766	7.00032e-07	3.6523e-05	Down
6175	RPLP0	-1.20509	7.34387e-07	3.81459e-05	Down
9180	OSMR	-1.18676	7.81321e-07	4.01731e-05	Down
80308	FLAD1	-1.15391	8.31937e-07	4.20953e-05	Down
9045	RPL14	-1.14292	9.38992e-07	4.65098e-05	Down
55187	VPS13D	-1.17076	1.00429e-06	4.91221e-05	Down
3015	H2AFZ	-1.15635	1.00367e-06	4.91221e-05	Down
2874	GPS2	-1.16302	1.0504e-06	5.04266e-05	Down
2687	GGT5	-1.13082	1.3249e-06	6.14741e-05	Down
10328	EMC8	-1.18979	1.73657e-06	7.87782e-05	Down
27232	GNMT	-1.12589	2.20689e-06	9.77611e-05	Down
3384	ICAM2	-1.09907	2.3122e-06	0.000102041	Down
4967	OGDH	-1.09804	2.33352e-06	0.000102596	Down
875	CBS	-1.1475	2.54157e-06	0.000107322	Down
7360	UGP2	-1.14599	2.52663e-06	0.000107322	Down
79689	STEAP4	-1.10522	2.52548e-06	0.000107322	Down
1105	CHD1	-1.09961	2.54021e-06	0.000107322	Down
8344	HIST1H2BE	-1.17667	2.62172e-06	0.00011031	Down
10270	AKAP8	-1.11851	2.70991e-06	0.000113253	Down
28513	CDH19	-1.09346	2.73486e-06	0.000113846	Down
3601	IL15RA	-1.10323	2.76855e-06	0.000114731	Down
26112	CCDC69	-1.10466	2.83472e-06	0.000116761	Down
83460	EMC6	-1.07256	3.31715e-06	0.000133815	Down
10162	LPCAT3	-1.07737	3.37602e-06	0.000135723	Down
8225	GTPBP6	-1.06761	3.52284e-06	0.000140662	Down
5714	PSMD8	-1.09147	3.58476e-06	0.000141689	Down
5684	PSMA3	-1.08766	3.57538e-06	0.000141689	Down
2888	GRB14	-1.08317	3.57912e-06	0.000141689	Down
4356	MPP3	-1.07332	3.83265e-06	0.000150473	Down
6103	RPGR	-1.10592	3.98379e-06	0.000154342	Down
9526	MPDU1	-1.06332	4.27596e-06	0.000164575	Down
51042	ZNF593	-1.133	4.4589e-06	0.000170498	Down
1981	EIF4G1	-1.07809	4.57698e-06	0.000173881	Down
3177	SLC29A2	-1.04809	5.53085e-06	0.000205464	Down
23580	CDC42EP4	-1.06307	5.59916e-06	0.000207345	Down
6196	RPS6KA2	-1.08691	5.84046e-06	0.000214925	Down
7048	TGFBR2	-1.04581	5.95183e-06	0.000218339	Down
10267	RAMP1	-1.13218	6.14672e-06	0.000223394	Down
6176	RPLP1	-1.07052	6.19582e-06	0.000224484	Down
8545	CGGBP1	-1.09773	6.90817e-06	0.000245012	Down
5052	PRDX1	-1.10758	6.95498e-06	0.000245179	Down
3336	HSPE1	-1.10728	7.00791e-06	0.000246305	Down
5745	PTH1R	-1.04537	8.53294e-06	0.000293748	Down
249	ALPL	-1.03085	9.2225e-06	0.000314718	Down
51455	REV1	-1.01634	1.03245e-05	0.000339658	Down
201254	STRA13	-1.0229	1.06738e-05	0.000349024	Down
50814	NSDHL	-1.02676	1.12954e-05	0.000366288	Down
7327	UBE2G2	-1.01175	1.19467e-05	0.000381092	Down
1368	CPM	-1.03821	1.22348e-05	0.000386088	Down
10611	PDLIM5	-1.02406	1.24461e-05	0.000391703	Down
2252	FGF7	-1.00756	1.32347e-05	0.000409511	Down
27006	FGF22	-1.01614	1.51667e-05	0.000460056	Down
6675	UAP1	-1.0364	1.56288e-05	0.000469374	Down
5810	RAD1	-1.03526	1.62706e-05	0.000481111	Down
1052	CEBPD	-1.04379	1.63818e-05	0.000482892	Down
3099	HK2	-1.03798	1.76695e-05	0.000514697	Down
64850	ETNPPL	-0.99578	1.91538e-05	0.000552447	Down
55186	SLC25A36	-0.971818	2.02359e-05	0.000579389	Down
54438	GFOD1	-0.980388	2.12624e-05	0.000602897	Down
51207	DUSP13	-0.983968	2.21373e-05	0.000624687	Down
57817	HAMP	-1.02195	2.26971e-05	0.000635897	Down
23099	ZBTB43	-0.964877	2.38659e-05	0.000662322	Down
79080	CCDC86	-1.06524	2.45626e-05	0.000676855	Down
1983	EIF5	-1.03586	2.51335e-05	0.000689352	Down
54187	NANS	-0.957731	2.53615e-05	0.000693984	Down
5793	PTPRG	-0.963923	2.64386e-05	0.000720099	Down
55272	IMP3	-1.02651	2.69233e-05	0.000729247	Down
9789	SPCS2	-1.00785	2.72484e-05	0.00073533	Down
6193	RPS5	-1.00851	2.75014e-05	0.000738761	Down
3658	IREB2	-0.975306	2.7905e-05	0.000745956	Down
11222	MRPL3	-0.951523	2.88162e-05	0.000765325	Down
55671	SMEK1	-1.05269	3.03445e-05	0.000796899	Down
57509	MTUS1	-0.952891	3.18081e-05	0.000826096	Down
8837	CFLAR	-0.956291	3.42675e-05	0.000878311	Down
7716	VEZF1	-0.982322	3.5736e-05	0.000906059	Down
328	APEX1	-0.940611	3.60748e-05	0.000912676	Down
10630	PDPN	-1.01163	3.74695e-05	0.000929925	Down
23476	BRD4	-0.984962	3.74334e-05	0.000929925	Down
4154	MBNL1	-0.959537	3.74554e-05	0.000929925	Down
91120	ZNF682	-0.947617	3.853e-05	0.000950217	Down
360	AQP3	-0.935502	3.86765e-05	0.000951832	Down
8454	CUL1	-0.964565	4.35373e-05	0.00103879	Down
23175	LPIN1	-0.922574	4.62162e-05	0.00109161	Down
2642	GCGR	-0.961592	4.64208e-05	0.00109424	Down
56999	ADAMTS9	-0.921432	4.75639e-05	0.00111671	Down
64344	HIF3A	-0.928908	4.78805e-05	0.00112189	Down
93664	CADPS2	-0.91726	4.87457e-05	0.00113763	Down
11224	RPL35	-0.957585	5.02708e-05	0.00116396	Down
51082	POLR1D	-0.91466	5.14709e-05	0.00118474	Down
57117	INTS12	-0.957741	5.53981e-05	0.00126521	Down
16	AARS	-1.0163	5.61543e-05	0.00127975	Down
4892	NRAP	-0.957194	5.62527e-05	0.00127975	Down
5245	PHB	-0.925358	5.71771e-05	0.00128674	Down
93081	TEX30	-0.959417	6.11693e-05	0.0013574	Down
51651	PTRH2	-0.955226	6.32142e-05	0.00138933	Down
125	ADH1B	-0.94104	6.32429e-05	0.00138933	Down
55687	TRMU	-0.913921	6.3455e-05	0.00138933	Down
481	ATP1B1	-0.901651	6.60205e-05	0.00143521	Down
10525	HYOU1	-0.950485	6.65662e-05	0.00144174	Down
114897	C1QTNF1	-0.968796	6.70387e-05	0.0014493	Down
55658	RNF126	-0.964164	6.80322e-05	0.00146269	Down
51287	COA4	-0.973017	6.81914e-05	0.00146344	Down
3856	KRT8	-0.908054	7.14961e-05	0.00152877	Down
10574	CCT7	-0.967227	7.25563e-05	0.00154776	Down
4927	NUP88	-0.937696	7.29309e-05	0.00155097	Down
10237	SLC35B1	-0.90025	7.44082e-05	0.00157383	Down
55022	PID1	-0.908158	7.48017e-05	0.00157931	Down
29074	MRPL18	-0.977201	7.6868e-05	0.00160847	Down
11326	VSIG4	-0.962073	7.79592e-05	0.00161976	Down
10419	PRMT5	-0.963308	8.0561e-05	0.00166497	Down
79058	ASPSCR1	-0.913516	8.08083e-05	0.00166715	Down
8202	NCOA3	-0.905651	8.23011e-05	0.00169497	Down
4616	GADD45B	-0.941119	8.27173e-05	0.00169758	Down
8563	THOC5	-0.940617	8.52329e-05	0.00174312	Down
81539	SLC38A1	-0.9021	8.72157e-05	0.00176826	Down
54512	EXOSC4	-0.930106	8.78071e-05	0.00177718	Down
26207	PITPNC1	-0.89928	9.07379e-05	0.00183019	Down
5029	P2RY2	-0.939774	9.12757e-05	0.00183788	Down
81563	C1orf21	-0.951785	9.24919e-05	0.001856	Down
2101	ESRRA	-0.87813	9.36422e-05	0.00187268	Down
55327	LIN7C	-0.932729	9.5512e-05	0.00190359	Down
64400	AKTIP	-0.876472	0.000103049	0.00201952	Down
5493	PPL	-0.891465	0.000104525	0.00204163	Down
83716	CRISPLD2	-0.890064	0.00010543	0.00204907	Down
23683	PRKD3	-0.909889	0.000115752	0.00223123	Down
151987	PPP4R2	-0.915377	0.000119323	0.00228878	Down
1785	DNM2	-0.876623	0.000120173	0.00229758	Down
9334	B4GALT5	-0.940461	0.000125113	0.00237682	Down
6637	SNRPG	-0.876452	0.000125998	0.00238948	Down
54107	POLE3	-0.949004	0.000132663	0.00249574	Down
28984	RGCC	-0.891912	0.000138102	0.0025774	Down
10410	IFITM3	-0.870246	0.000142307	0.00264327	Down
8834	TMEM11	-0.861885	0.000144781	0.00267651	Down
25939	SAMHD1	-0.86693	0.000145984	0.00269028	Down
1495	CTNNA1	-0.856888	0.000155601	0.00283633	Down
171546	SPTSSA	-0.86091	0.000156932	0.00285615	Down
4811	NID1	-0.856639	0.000160139	0.00291003	Down
3854	KRT6B	-0.865711	0.00016585	0.00299065	Down
51304	ZDHHC3	-0.895347	0.000169155	0.0030409	Down
10241	CALCOCO2	-0.860149	0.000169474	0.00304198	Down
6654	SOS1	-0.860206	0.000171907	0.00306722	Down
10061	ABCF2	-0.930075	0.000175304	0.00309923	Down
22875	ENPP4	-0.858664	0.000188268	0.00329863	Down
5128	CDK17	-0.930132	0.000191377	0.00334312	Down
2875	GPT	-0.848307	0.000195798	0.00339509	Down
3316	HSPB2	-0.856221	0.000198279	0.00342294	Down
6274	S100A3	-0.841277	0.000200009	0.00344774	Down
6397	SEC14L1	-0.843237	0.000203537	0.0035034	Down
369	ARAF	-0.845282	0.000211534	0.00360406	Down
1051	CEBPB	-0.897103	0.000212659	0.00361273	Down
6280	S100A9	-0.842153	0.00021542	0.00365437	Down
10211	FLOT1	-0.85217	0.000218953	0.00369825	Down
27065	NSG1	-0.845711	0.000219615	0.00370412	Down
55151	TMEM38B	-0.832698	0.000225091	0.00376939	Down
6813	STXBP2	-0.834234	0.000230141	0.00382125	Down
54842	MFSD6	-0.816864	0.000266106	0.00427335	Down
2935	GSPT1	-0.831641	0.000272822	0.00436924	Down
23095	KIF1B	-0.86647	0.000277366	0.00443597	Down
3977	LIFR	-0.806477	0.000298426	0.00471523	Down
6744	SSFA2	-0.854061	0.00030267	0.0047756	Down
51295	ECSIT	-0.838121	0.000315894	0.00492468	Down
9904	RBM19	-0.874022	0.000323925	0.00502674	Down
3482	IGF2R	-0.805937	0.000325946	0.00504121	Down
10274	STAG1	-0.820187	0.00034912	0.00535728	Down
28955	DEXI	-0.800709	0.000352297	0.00539897	Down
306	ANXA3	-0.846109	0.00036365	0.00555122	Down
8503	PIK3R3	-0.857434	0.000370325	0.00563836	Down
27173	SLC39A1	-0.816294	0.0003708	0.00563836	Down
7316	UBC	-0.863193	0.00039428	0.00594154	Down
51001	MTERF3	-0.796693	0.000394026	0.00594154	Down
10226	PLIN3	-0.842032	0.000395238	0.0059435	Down
1674	DES	-0.788165	0.000410806	0.00614656	Down
9367	RAB9A	-0.873421	0.000436759	0.00646754	Down
9690	UBE3C	-0.860316	0.000438611	0.00648471	Down
115207	KCTD12	-0.799931	0.000464911	0.00681347	Down
23786	BCL2L13	-0.79109	0.000473551	0.0069056	Down
29115	SAP30BP	-0.842582	0.000481469	0.00699501	Down
9909	DENND4B	-0.772504	0.000491283	0.00709499	Down
4357	MPST	-0.804563	0.00050697	0.00726658	Down
594	BCKDHB	-0.769011	0.000506827	0.00726658	Down
5894	RAF1	-0.796293	0.000507765	0.00726909	Down
64960	MRPS15	-0.773954	0.000512928	0.00732514	Down
29078	NDUFAF4	-0.80317	0.00051363	0.00732624	Down
3459	IFNGR1	-0.785011	0.00052389	0.00744546	Down
10581	IFITM2	-0.804859	0.000532592	0.00753265	Down
1737	DLAT	-0.777929	0.00056013	0.00783715	Down
7580	ZNF32	-0.786506	0.000575892	0.00802898	Down
5702	PSMC3	-0.789084	0.000584397	0.00811958	Down
8692	HYAL2	-0.852238	0.000620909	0.00842642	Down
23348	DOCK9	-0.778863	0.000629199	0.00851923	Down
83937	RASSF4	-0.820004	0.000636145	0.00858166	Down
23765	IL17RA	-0.765926	0.000640113	0.00861562	Down
8544	PIR	-0.806655	0.000642423	0.0086286	Down
57820	CCNB1IP1	-0.809066	0.00065026	0.00871198	Down
23170	TTLL12	-0.820647	0.000656097	0.00874613	Down
8615	USO1	-0.79089	0.00065927	0.00875139	Down
4047	LSS	-0.772101	0.000659765	0.00875139	Down
64943	NT5DC2	-0.818457	0.000672799	0.00889653	Down
8674	VAMP4	-0.779037	0.000677489	0.00890598	Down
27095	TRAPPC3	-0.789162	0.000678686	0.00891016	Down
8533	COPS3	-0.784768	0.000685309	0.00895862	Down
8554	PIAS1	-0.750095	0.000695581	0.0090722	Down
563	AZGP1	-0.777405	0.000710212	0.00923276	Down
10248	POP7	-0.758914	0.0007218	0.00933173	Down
26472	PPP1R14B	-0.761749	0.000743943	0.00957582	Down
56255	TMX4	-0.766882	0.000746568	0.00959908	Down
2040	STOM	-0.797762	0.000753387	0.00966935	Down
26071	FAM127B	-0.743564	0.000753681	0.00966935	Down
4552	MTRR	-0.795703	0.000761191	0.00975505	Down
8613	PPAP2B	-0.741077	0.000772908	0.00985143	Down
9209	LRRFIP2	-0.740863	0.000793852	0.0100637	Down
8751	ADAM15	-0.752575	0.000819114	0.0103393	Down
11170	FAM107A	-0.758251	0.000827709	0.0104366	Down
11171	STRAP	-0.783482	0.00083014	0.0104448	Down
23788	MTCH2	-0.776347	0.000841899	0.0105814	Down
79805	VASH2	-0.735848	0.000845461	0.0106035	Down
3791	KDR	-0.748122	0.000857567	0.010721	Down
79733	E2F8	-0.79471	0.000862029	0.010731	Down
80019	UBTD1	-0.762047	0.000870166	0.0108119	Down
29098	RANGRF	-0.809378	0.000878775	0.0108818	Down
54968	TMEM70	-0.762529	0.000894846	0.0110111	Down
10589	DRAP1	-0.747321	0.000894366	0.0110111	Down
1316	KLF6	-0.796957	0.000908231	0.0111408	Down
23333	DPY19L1	-0.744129	0.000938592	0.0114415	Down
51373	MRPS17	-0.757986	0.000951502	0.0115389	Down
10114	HIPK3	-0.751857	0.000973378	0.0117556	Down
80271	ITPKC	-0.741125	0.000993551	0.0119501	Down
23596	OPN3	-0.779124	0.00100148	0.0120208	Down
5822	PWP2	-0.777806	0.00101068	0.0120799	Down
6208	RPS14	-0.733107	0.00101155	0.0120799	Down
5425	POLD2	-0.797461	0.00104483	0.0124337	Down
22937	SCAP	-0.733346	0.00104541	0.0124337	Down
2872	MKNK2	-0.764812	0.00111833	0.0131413	Down
4189	DNAJB9	-0.754784	0.00113854	0.0132989	Down
1760	DMPK	-0.764361	0.00114626	0.0133625	Down
3895	KTN1	-0.746452	0.00117877	0.0135795	Down
419	ART3	-0.900374	0.00119526	0.0137157	Down
3274	HRH2	-0.725822	0.00123978	0.0140753	Down
3775	KCNK1	-0.749065	0.00125267	0.0141941	Down
55908	C19orf80	-0.746184	0.00125881	0.0142363	Down
2551	GABPA	-0.737731	0.00126107	0.014248	Down
23244	PDS5A	-0.739793	0.0013094	0.014667	Down
26135	SERBP1	-0.788046	0.00131603	0.0147272	Down
1017	CDK2	-0.759087	0.00132314	0.0147646	Down
11334	TUSC2	-0.753506	0.00132192	0.0147646	Down
80746	TSEN2	-0.710681	0.00132738	0.0147838	Down
5583	PRKCH	-0.738527	0.00132946	0.014793	Down
4238	MFAP3	-0.77776	0.00133234	0.0148109	Down
5718	PSMD12	-0.783231	0.0013362	0.0148397	Down
896	CCND3	-0.724401	0.00136463	0.0150983	Down
7430	EZR	-0.749833	0.00137797	0.0152173	Down
1147	CHUK	-0.766157	0.00140414	0.0154337	Down
3192	HNRNPU	-0.774658	0.00143536	0.0156595	Down
30819	KCNIP2	-0.707287	0.00143695	0.0156624	Down
9604	RNF14	-0.743609	0.00153025	0.0164352	Down
6921	TCEB1	-0.738577	0.00156217	0.016656	Down
6926	TBX3	-0.702871	0.00156466	0.0166675	Down
5728	PTEN	-0.720202	0.00157727	0.0167562	Down
8703	B4GALT3	-0.762235	0.00158643	0.0168382	Down
5465	PPARA	-0.711358	0.00159809	0.0169161	Down
6128	RPL6	-0.747958	0.00161102	0.0170376	Down
51075	TMX2	-0.714759	0.00162072	0.0171248	Down
5286	PIK3C2A	-0.711164	0.00165586	0.0174177	Down
950	SCARB2	-0.786378	0.00166461	0.0174784	Down
8776	MTMR1	-0.764432	0.00170224	0.0177623	Down
5875	RABGGTA	-0.695421	0.0017362	0.0180206	Down
27351	DESI1	-0.70544	0.00174989	0.0181466	Down
10634	GAS2L1	-0.69313	0.00176211	0.0182572	Down
331	XIAP	-0.726404	0.00178337	0.0184125	Down
3094	HINT1	-0.686402	0.00182955	0.0188561	Down
4012	LNPEP	-0.77064	0.00184211	0.0189467	Down
5546	PRCC	-0.743853	0.00184803	0.0189467	Down
8888	MCM3AP	-0.703888	0.00184733	0.0189467	Down
10362	HMG20B	-0.734718	0.00185308	0.0189654	Down
3757	KCNH2	-0.693791	0.00185167	0.0189654	Down
7009	TMBIM6	-0.729692	0.00186752	0.0190633	Down
26873	OPLAH	-0.753672	0.00188892	0.0192483	Down
4121	MAN1A1	-0.698031	0.00189674	0.0193112	Down
10497	UNC13B	-0.676152	0.00190022	0.0193258	Down
10924	SMPDL3A	-0.713421	0.00192028	0.0194563	Down
9945	GFPT2	-0.741846	0.001924	0.0194706	Down
8192	CLPP	-0.675826	0.00195253	0.0195737	Down
10799	RPP40	-0.697646	0.00197972	0.0198124	Down
9373	PLAA	-0.734943	0.00199157	0.0198971	Down
7879	RAB7A	-0.733862	0.00199668	0.0199311	Down
5691	PSMB3	-0.710477	0.00203488	0.0202722	Down
54726	OTUD4	-0.695741	0.0020412	0.0202722	Down
81894	SLC25A28	-0.731707	0.00206734	0.0205143	Down
290	ANPEP	-0.684935	0.00208013	0.0205891	Down
29984	RHOD	-0.70563	0.00210691	0.020784	Down
10052	GJC1	-0.714049	0.00212637	0.0209584	Down
3313	HSPA9	-0.747116	0.00213974	0.0210372	Down
439	ASNA1	-0.692939	0.00216684	0.0212148	Down
6810	STX4	-0.722217	0.00217825	0.0212732	Down
3745	KCNB1	-0.690693	0.0022069	0.0215173	Down
10269	ZMPSTE24	-0.689538	0.00221695	0.0215794	Down
114885	OSBPL11	-0.670849	0.002229	0.0216608	Down
4904	YBX1	-0.668465	0.00223309	0.0216825	Down
56986	DTWD1	-0.700183	0.00224391	0.0217696	Down
30968	STOML2	-0.667892	0.00224922	0.0218031	Down
29855	UBN1	-0.682887	0.00226444	0.0219178	Down
5552	SRGN	-0.706502	0.00227319	0.0219629	Down
10195	ALG3	-0.692153	0.00231568	0.0223367	Down
8348	HIST1H2BO	-0.708404	0.00235884	0.0226744	Down
5733	PTGER3	-0.700091	0.00242966	0.0231666	Down
2585	GALK2	-0.685652	0.00247659	0.0235025	Down
9060	PAPSS2	-0.674003	0.00251098	0.0237269	Down
11193	WBP4	-0.671134	0.00251721	0.0237536	Down
23173	METAP1	-0.670684	0.00255023	0.0240074	Down
8243	SMC1A	-0.671129	0.00257162	0.0241506	Down
3911	LAMA5	-0.742557	0.00262961	0.0245772	Down
4211	MEIS1	-0.71669	0.00262859	0.0245772	Down
80267	EDEM3	-0.695572	0.00262804	0.0245772	Down
64398	MPP5	-0.694417	0.00264536	0.0246851	Down
7414	VCL	-0.679881	0.00266512	0.0248104	Down
5861	RAB1A	-0.712635	0.00270288	0.0250823	Down
55505	NOP10	-0.668812	0.00271389	0.0251447	Down
6415	SEPW1	-0.673728	0.00273745	0.025343	Down
655	BMP7	-0.661356	0.00276622	0.0255489	Down
65979	PHACTR4	-0.681488	0.00282551	0.0259942	Down
9322	TRIP10	-0.668834	0.00284755	0.0261113	Down
84818	IL17RC	-0.670782	0.00288064	0.0263569	Down
54811	ZNF562	-0.700963	0.00288991	0.0264211	Down
5271	SERPINB8	-0.679983	0.00290055	0.0264771	Down
9391	CIAO1	-0.706299	0.00295627	0.026923	Down
6663	SOX10	-0.641262	0.00299232	0.027188	Down
23030	KDM4B	-0.653835	0.00299632	0.0272032	Down
10084	PQBP1	-0.657219	0.00300112	0.0272257	Down
5711	PSMD5	-0.69056	0.00304016	0.027495	Down
2799	GNS	-0.659569	0.00304393	0.0275079	Down
5226	PGD	-0.706165	0.00307454	0.0277631	Down
51704	GPRC5B	-0.641553	0.00309205	0.0278783	Down
1979	EIF4EBP2	-0.647506	0.00310311	0.0279351	Down
65009	NDRG4	-0.662447	0.00317976	0.0285594	Down
4893	NRAS	-0.664752	0.00318719	0.0286043	Down
7704	ZBTB16	-0.658401	0.00321625	0.0287991	Down
51071	DERA	-0.641716	0.00328382	0.0292257	Down
541578	CXorf40B	-0.69076	0.00329785	0.0293284	Down
91137	SLC25A46	-0.649852	0.0033843	0.0298037	Down
26286	ARFGAP3	-0.69616	0.00342835	0.0301013	Down
23366	KIAA0895	-0.648907	0.00342721	0.0301013	Down
7705	ZNF146	-0.657378	0.00343385	0.030127	Down
51678	MPP6	-0.667308	0.00345046	0.0302167	Down
79694	MANEA	-0.668801	0.00349995	0.0305471	Down
3728	JUP	-0.689914	0.00358668	0.0310963	Down
6610	SMPD2	-0.656936	0.00358671	0.0310963	Down
5475	PPEF1	-0.635684	0.00361164	0.0312663	Down
8123	PWAR5	-0.693536	0.00363638	0.0314541	Down
5420	PODXL	-0.645057	0.0036387	0.0314541	Down
1482	NKX2-5	-0.655705	0.00370196	0.031907	Down
2971	GTF3A	-0.661042	0.00371919	0.032032	Down
29899	GPSM2	-0.632244	0.00379214	0.0323735	Down
28971	AAMDC	-0.637203	0.00381498	0.0325229	Down
9868	TOMM70A	-0.64717	0.0038578	0.0328165	Down
10557	RPP38	-0.649484	0.00390718	0.033105	Down
79651	RHBDF2	-0.632645	0.00391769	0.0331338	Down
3059	HCLS1	-0.650594	0.00395888	0.0334341	Down
8560	DEGS1	-0.625224	0.00400085	0.0336761	Down
64981	MRPL34	-0.620783	0.00400817	0.0337048	Down
4891	SLC11A2	-0.642904	0.00404102	0.033884	Down
6005	RHAG	-0.619316	0.00406279	0.0340179	Down
59338	PLEKHA1	-0.665448	0.00413915	0.0344607	Down
26234	FBXL5	-0.700201	0.00421074	0.0349328	Down
6183	MRPS12	-0.692771	0.00422765	0.0350235	Down
7905	REEP5	-0.643627	0.0042601	0.0352259	Down
5501	PPP1CC	-0.615849	0.00427802	0.0353401	Down
5791	PTPRE	-0.698021	0.00429372	0.0353712	Down
2766	GMPR	-0.618362	0.00449389	0.0366826	Down
8702	B4GALT4	-0.670856	0.0045312	0.0369131	Down
4045	LSAMP	-0.628285	0.00454294	0.0369831	Down
10277	UBE4B	-0.62543	0.00455647	0.0370419	Down
4729	NDUFV2	-0.61542	0.0045659	0.037079	Down
80305	TRABD	-0.661079	0.0046031	0.0372661	Down
26175	TMEM251	-0.63525	0.00462172	0.037391	Down
9513	FXR2	-0.607733	0.00469823	0.0378275	Down
57099	AVEN	-0.658038	0.00470208	0.0378326	Down
4803	NGF	-0.617248	0.004778	0.0382299	Down
90411	MCFD2	-0.686801	0.00482711	0.0384956	Down
5886	RAD23A	-0.637893	0.00484253	0.0385661	Down
10791	VAMP5	-0.648334	0.00485181	0.0386139	Down
4217	MAP3K5	-0.610408	0.00486479	0.0386647	Down
7525	YES1	-0.649427	0.00489388	0.0388433	Down
29956	CERS2	-0.669138	0.00491323	0.0389705	Down
94	ACVRL1	-0.600636	0.00505621	0.0398622	Down
5441	POLR2L	-0.682597	0.00510537	0.0401834	Down
376412	RNF126P1	-0.620264	0.00512143	0.0402413	Down
9857	CEP350	-0.630816	0.0051367	0.0403343	Down
79017	GGCT	-0.638341	0.00521831	0.0407299	Down
80124	VCPIP1	-0.657945	0.00523983	0.0408707	Down
9040	UBE2M	-0.618039	0.00530131	0.0411968	Down
56005	C19orf10	-0.669585	0.00538034	0.0416072	Down
2207	FCER1G	-0.652238	0.0054493	0.0419825	Down
9716	AQR	-0.624371	0.00545747	0.0419825	Down
64419	MTMR14	-0.618416	0.00549086	0.0421568	Down
952	CD38	-0.607075	0.0056019	0.0427573	Down
7805	LAPTM5	-0.645418	0.00564542	0.0430056	Down
4340	MOG	-0.594923	0.00583074	0.0440741	Down
1040	CDS1	-0.625917	0.00585783	0.0441935	Down
29914	UBIAD1	-0.664814	0.00591543	0.0445136	Down
55003	PAK1IP1	-0.629563	0.00592151	0.0445308	Down
6228	RPS23	-0.60162	0.00594288	0.0446135	Down
5376	PMP22	-0.601087	0.00601109	0.0450027	Down
9263	STK17A	-0.659129	0.00629871	0.04662	Down
3032	HADHB	-0.591809	0.00635485	0.0468885	Down
81614	NIPA2	-0.671773	0.00645768	0.0474682	Down
1629	DBT	-0.607833	0.00651294	0.0477847	Down
84790	TUBA1C	-0.634062	0.00655976	0.0480681	Down
6720	SREBF1	-0.58718	0.00655942	0.0480681	Down
23632	CA14	-0.597738	0.00667921	0.0488215	Down
637	BID	-0.589979	0.00677309	0.0493846	Down
54801	HAUS6	-0.629371	0.00685438	0.049761	Down
